# Supplementary material for: Community Detection in Large-Scale Bipartite Biological Networks
Source: Front Genet. 2021 Apr 21;12:649440. doi: 10.3389/fgene.2021.649440 (PMC8099108; doi:10.3389/fgene.2021.649440)
Supplement: Supplementary Table 1 — Co-clusters in the drug-gene network, detected using biLouvain and Murata+. Rows represent the co-clustered communities (detected on the gene node set in column 1, on the drug node set in column 2), as well as the genes and drugs present in those communities (columns 3 and 4, respectively). [file Data_Sheet_1.XLSX]

## Sheet: Supplemental_table_1_Gene_Drug_Communities
Community_Genes	Community_Drugs	Genes	Drugs
0	370	ADORA2A,ADORA3,ADORA1,ADORA2B,OGG1,PI4K2A,SHH,PI4K2B,SERPINF1	CHEMBL72862,CHEMBL375293,CHEMBL136689,CHEMBL76273,GS 6201,CHEMBL309566,CHEMBL285819,CHEMBL317382,CHEMBL88147,CHEMBL472925,ROLOFYLLINE (CHEMBL2103819),N6-CYCLOPENTYLADENOSINE,CGS-15943,CAFFEINE,CHEMBL1256672,CHEMBL32582,VIPADENANT,ISTRADEFYLLINE,CHEMBL16997,TONAPOFYLLINE,TECADENOSON,PRELADENANT,CHEMBL273807,V81444,ADENOSINE,REGADENOSON,CHEMBL1234624,CHEMBL130499,BVT.115959,CHEMBL410873,CGS-21680,C…
43	371	OPRM1,OPRK1,OPRD1,ITGAM,PDYN,CRH,PER1,SLCO2B1	SUFENTANIL,ALVIMOPAN,LEVOMETHADYL ACETATE,CHEMBL140278,ROSIGLITAZONE,ANILERIDINE,SAMIDORPHAN,LEVALLORPHAN TARTRATE,OXYMORPHONE,NALOXONE HYDROCHLORIDE,MORPHINE,DIPRENORPHINE,LOPERAMIDE,HYDROMORPHONE HYDROCHLORIDE,BEVENOPRAN,CHEMBL442577,AXOMADOL,ETORPHINE (CHEMBL1908334),NALTRIBEN,CLARITHROMYCIN,ODELEPRAN,LEVORPHANOL TARTRATE,CODEINE POLISTIREX,NALOXONE BENZOYLHYDRAZONE,ALFENTANIL,BUTORPHANOL,DELT…
312	372	ASGR1,ASIC1,SCNN1A,SCNN1B,PKD2L1,SCNN1D,SCNN1G,SLC9A5	CITRIC ACID,AMILORIDE,TRIAMTERENE,5-(N-ETHYL-N-ISOPROPYL)AMILORIDE,CHEMBL212432,BENZAMIL,AMILORIDE HYDROCHLORIDE,MALIC ACID,P-1037,PHENAMIL
320	373	NOS2,TPX2	1400W,TILARGININE,N (g)-NITRO-L-ARGININE,CHEMBL107201,PIMAGEDINE HYDROCHLORIDE
217	374	ATP2A2	ISTAROXIME,ENOXACIN
35	375	ADRB2,UGT1A1,ADRB1,ADRB3,LPL,HSPB2,ADCYAP1,SMYD2,LTA4H,IVL	ALPRENOLOL,LEVOBUNOLOL,SOLABEGRON,ESMOLOL,ISOPROTERENOL SULFATE,GLYCOPYRROLATE BROMIDE,PROPRANOLOL,CHEMBL198059,LEVALBUTEROL TARTRATE,BEVANTOLOL,LABETALOL,ARFORMOTEROL TARTRATE,CARTEOLOL,TERBUTALINE,CARMOTEROL,TIMOLOL,CHEMBL3186106,OXPRENOLOL,VILANTEROL,ISOPROTERENOL HYDROCHLORIDE,NADOLOL,LAS190792,OLODATEROL HYDROCHLORIDE,PROTOKYLOL HYDROCHLORIDE,EPHEDRINE,CARVEDILOL PHOSPHATE,FORMOTEROL,ABEDITE…
232	376	GNRHR,GNRH1,GNRHR2,MBL2	CHEMBL179691,DAPSONE,ESTROGENS, CONJUGATED,ABARELIX,SUFUGOLIX,LEUPROLIDE,HISTRELIN,KLH-2109,GONADORELIN,DEGARELIX,DANAZOL,GANIRELIX ACETATE,OZARELIX,HISTRELIN ACETATE,NAFARELIN,FERTIRELIN,ITURELIX,DESLORELIN,CHEMBL474991,NAFARELIN ACETATE,TRIPTORELIN PAMOATE,ELAGOLIX,DEGARELIX ACETATE,Relugolix,GONADORELIN HYDROCHLORIDE,TEVERELIX,CETRORELIX ACETATE,TRETOQUINOL,CHEMBL3272516,Zoptarelin doxorubicin
57	377	SCN11A,SCN4A,SCN5A,SCN9A,SLC1A1,SCN1A,SCN10A,SCN3A,SCN8A,HLA-B,SCN7A,SCN1B,KCNJ2,SLC7A11,FZD6,SCN3B,HLA-A,DPYSL2,PPT1,SCN4B,SCN2B	NKTR-171,ORPHENADRINE (CHLORIDE),ESLICARBAZEPINE,FOSPHENYTOIN,BENOXINATE HYDROCHLORIDE,DRONEDARONE HYDROCHLORIDE,ETHOTOIN,PHENYTOIN,ZONISAMIDE,ARTICAINE HYDROCHLORIDE,SAFINAMIDE,FOSPHENYTOIN SODIUM,RUFINAMIDE,PROPAFENONE HYDROCHLORIDE,CARBAMAZEPINE,OXCARBAZEPINE,TOCAINIDE HYDROCHLORIDE,PROPOXYCAINE HYDROCHLORIDE,ETIDOCAINE HYDROCHLORIDE,RALFINAMIDE,TETRACAINE,ORPHENADRINE CITRATE,PHENACEMIDE,HEXY…
97	378	HRH3	TIPROLISANT,GSK189254,MK-0249,CHEMBL1767164,CIPRALISANT MALEATE,BETAHISTINE,ABT-288,PF-03654764,JNJ-17216498,IRDABISANT,BAVISANT,PF-03654746
96	379	CRBN,CUL4A,RBX1,IKZF1,DDB1	LENALIDOMIDE,POMALIDOMIDE,THALIDOMIDE
41	380	PTGER2,PTGER4,PTGER3,TBXA2R,PTGDR,PTGDR2,PTGER1,PTGIR,PTGFR	CHEMBL239226,CHEMBL565591,CHEMBL265012,TERBOGREL,CHEMBL521784,CHEMBL402162,CHEMBL1317823,TREPROSTINIL,OC000459,CHEMBL116837,MIANSERIN,CARBACYCLIN,RAMATROBAN,FEVIPIPRANT,DINOPROST TROMETHAMINE,CHEMBL3246389,ENPROSTIL,CHEMBL275667,CHEMBL358653,BERAPROST,CLOPROSTENOL (CHEMBL2220404),CHEMBL357834,CHEMBL597997,CHEMBL1628262,EPOPROSTENOL,SULPROSTONE,MISOPROSTOL,EPOPROSTENOL SODIUM,CARBOPROST TROMETHAMI…
11	381	TUBA3E,TUBA1A,TUBB1,TUBB2B,TUBA1C,TUBB8,TUBB3,TUBA1B,CDK2,TUBA4A,TUBB6,TUBB2A,TUBA3D,TUBB,TUBB4B,TLE3,STMN1,PGP,ABCC10,ERCC2,NFE2,ABCC3,EIF4EBP1,PDCD4,SPARC	COLCHICINE,MEBENDAZOLE,PACLITAXEL,VINCRISTINE SULFATE,TRASTUZUMAB EMTANSINE,BRENTUXIMAB VEDOTIN,VINBLASTINE SULFATE,PACLITAXEL POLIGLUMEX,VERUBULIN,SAGOPILONE,VINORELBIN DITARTRATE,INDIBULIN,VINBLASTINE,VINFLUNINE,CABAZITAXEL,ERIBULIN MESYLATE,CROLIBULIN,DOCETAXEL HYDRATE,CHEMBL509507,FOSBRETABULIN DISODIUM,ANG1005,FOSBRETABULIN TROMETHAMINE,DAVUNETIDE,IXABEPILONE,LEXIBULIN,TASIDOTIN,PLINABULIN,V…
6	382	SLC6A4,SLC6A2,SLC6A3,SLC29A4,CYP2D6,SLC6A19,CREBBP,MC2R,IDE	DULOXETINE,LISDEXAMFETAMINE,[3H]CITALOPRAM,CODEINE,BENZTROPINE,TRAMADOL,FENCAMFAMIN,PHENDIMETRAZINE TARTRATE,CEVIMELINE,DOTHIEPIN (CHEMBL1492500),VILAZODONE,ARIPIPRAZOLE,DESIPRAMINE,VENLAFAXINE,TRAZODONE,CLOMIPRAMINE,TRIMIPRAMINE,METHYLPHENIDATE HYDROCHLORIDE,DIETHYLPROPION HYDROCHLORIDE,CHEMBL488638,GUANETHIDINE,METHYLPHENIDATE,MINAPRINE,AMPHETAMINE ADIPATE,FLUVOXAMINE,CHEMBL131495,GUANADREL SUL…
7	383	AGTR1,SLC10A1	TASOSARTAN,SAPRISARTAN POTASSIUM,CANDESARTAN,CHEMBL344662,AZILSARTAN KAMEDOXOMIL,FORASARTAN,IRBESARTAN,CHEMBL288174,VALSARTAN,OLMESARTAN,OLMESARTAN MEDOXOMIL,EPROSARTAN,ANGIOTENSIN IV,LOSARTAN,TELMISARTAN,EPROSARTAN MESYLATE,SARALASIN ACETATE,CHEMBL345132,LOSARTAN POTASSIUM
279	384	TLR3	HYDROXYCHLOROQUINE,RINTATOLIMOD
209	385	MTNR1A,MTNR1B	RAMELTEON,CHEMBL13790,CHEMBL33549,TASIMELTEON,CHEMBL12296,AGOMELATINE,CHEMBL237236,CHEMBL1788358,CHEMBL189449,CHEMBL126809,CHEMBL1802025,CHEMBL1946226,CHEMBL34730,CHEMBL127421,CHEMBL1946221,CHEMBL514415,CHEMBL285718,CHEMBL429392,IODOMELATONIN,CHEMBL33185,LUZINDOLE,CHEMBL3260983,CHEMBL339105,CHEMBL1094546,CHEMBL10009,CHEMBL1774519
200	386	NALCN,HVCN1,ECE2	PYRIMETHAMINE,COBALT (II) ION
12	387	GGCX	PHYTONADIONE,ANISINDIONE
14	388	LTB4R	AMELUBANT,ETALOCIB,SC-41390
15	389	CLCN2,CLU	LUBIPROSTONE,CUSTIRSEN SODIUM,COBIPROSTONE,CUSTIRSEN
127	390	GRIN2A,GRIN3A,GRIN2D,GRIN3B,GRIN2C,GRIN1,GRIN2B,ERCC6,P2RX1,IL31RA,SLC38A4,TBX21	NEBOGLAMINE,LATREPIRDINE,ESKETAMINE HYDROCHLORIDE,MESORIDAZINE,DIZOCILPINE,(D)-SERINE,AV-101,ASPARTIC ACID,KETAMINE,DIMIRACETAM,DEXTROMETHORPHAN,AMANTADINE HYDROCHLORIDE,GW468816,MEMANTINE HYDROCHLORIDE,D-ASPARTATE,Radiprodil,CHEMBL1184349,ORPHENADRINE,LEVORPHANOL,RALOXIFENE,CERC-301,DEXTRORPHAN,CHEMBL273636,CHEMBL287327,CGP-37849,NERAMEXANE,CNS-5161,MODAFINIL,KETAMINE HYDROCHLORIDE,MEMANTINE,NRX…
224	391	AR,PAEP,CYP17A1	TESTOSTERONE UNDECANOATE,GALETERONE,GSK2881078,MIBOLERONE,GSK2849466,APC-100,ENOBOSARM,ODM-201,DROMOSTANOLONE,VK5211,ABIRATERONE,NANDROLONE,CYPROTERONE,METRIBOLONE,ENZALUTAMIDE,CB-03-01,HYDROXYFLUTAMIDE,NAFOXIDINE,ORTERONEL,ABIRATERONE ACETATE,CYPROTERONE ACETATE,NANDROLONE DECANOATE,ARN-509,(S,S)-FIDARESTAT,EPALRESTAT,CHEMBL125236,BISPHENOL A,LY2452473,AZD3514,ETHYLESTRENOL,MK-0773,HE3235,LGD-29…
254	392	AOX1,VKORC1L1,PROZ,PROC,NQO2,GAS6,PROS1	MENADIONE,WARFARIN,SODIUM TETRADECYL SULFATE,CARICOTAMIDE,ISOVANILLIN
29	393	FSHR	CHORIOGONADOTROPIN ALFA,MENOTROPINS,HUMAN FSH,UROFOLLITROPIN,CORIFOLLITROPIN ALFA
18	394	CHRNA10,KCNT1,CHRNA9	METHYLLYCACONITINE,NICOTINE,NICLOSAMIDE,LYSERGIDE,NERAMEXANE MESYLATE,LOXAPINE,TRIMETHAPHAN,CLOFILIUM,MUSCARINE,PENTOLINIUM
33	395	GABRE,GABRR1,GABRQ,GABRA5,GABRA1,GABRA3,GABRB2,GABRB1,GABRA4,GABRG1,GABRG3,GABRD,KCNK9,GABRB3,GABRA6,GABRR3,GABRP,GABRR2,GABRG2,TSPO,GABRA2,KCNK2,KCNK4,SCN2A,GRIK2,KCNK10,GLRA1,KCNK3,ATP5D,KCNK18,C3AR1,ATP2C1,GLRA2,ART3,KCNJ12,GPR68,KCNK13,ARSC2	CHLORDIAZEPOXIDE,TRIAZOLAM,MEPROBAMATE,PROPOFOL,CLONAZEPAM,CLORAZEPIC ACID,CLOBAZAM,HALAZEPAM,MIDAZOLAM,GANAXOLONE,ALPRAZOLAM,OXAZEPAM,METHADONE,DIAZEPAM,METHOXYFLURANE,DESFLURANE,CLORAZEPATE DIPOTASSIUM,BUTETHAL,HALOTHANE,THIAMYLAL SODIUM,BUTALBITAL,TEMAZEPAM,FLURAZEPAM HYDROCHLORIDE,PRIMIDONE,SEVOFLURANE,ADINAZOLAM,BUTABARBITAL,FLURAZEPAM,ACAMPROSATE CALCIUM,ZALEPLON,ZOPICLONE,FLUMAZENIL,ISOFLU…
20	396	DPP4	OMARIGLIPTIN,VILDAGLIPTIN,BEGELOMAB,SAXAGLIPTIN,ALOGLIPTIN,LINAGLIPTIN,SITAGLIPTIN PHOSPHATE,GOSOGLIPTIN,CARMEGLIPTIN,SAXAGLIPTIN HYDROCHLORIDE,CHEMBL386369,TRELAGLIPTIN SUCCINATE,SITAGLIPTIN,ALOGLIPTIN BENZOATE,CHEMBL1672127,DENAGLIPTIN,CHEMBL77538
296	397	GPRC6A	L-ALANINE,ARGININE,L-CITRULLINE,SERINE,ORNITHINE
186	398	CCR3,CCR1	GUANIDINO ACETATE,ENOXAPARIN,CHEMBL486030,HYPOXANTHINE,AZD4818,CHEMBL2158814,CCX354,CHEMBL1628706,GUANINE,CHEMBL20921
135	399	P4HTM,EGLN1,EGLN2,EGLN3	DAPRODUSTAT,CHEMBL426560,VADADUSTAT,ROXADUSTAT
23	400	AVPR2,VCAM1,AVPR1A,OXTR,AVPR1B,NR5A1,CLCN1,KDM6B,KDM3A,KDM4C,THBS4,OXT,SLC29A2	TOLVAPTAN,SRX251,ATOSIBAN,OXYTOCIN,VASOPRESSIN,MERCAPTOPURINE,CHEMBL312245,CHEMBL3274309,SELEPRESSIN,CHEMBL435323,ARECAIDINE PROPARGYL ESTER,VASOPRESSIN TANNATE,APRACLONIDINE,CONIVAPTAN HYDROCHLORIDE,TERLIPRESSIN,RELCOVAPTAN,FE 202767,CHEMBL332447,CHEMBL70099,CONIVAPTAN,MOZAVAPTAN,NELIVAPTAN,CARBETOCIN,APRINDINE,LYPRESSIN,CHEMBL3272682,BARUSIBAN,FELYPRESSIN,CHEMBL1254024,CHEMBL296908,CHEMBL265859…
1	401	PDGFRB,FGFR1,KDR,ALK,VHL,FLT1,PDGFRA,LIPC,ABL1,ABL2,WNK1,FLT3,KIT,RET,FLT4,EPHA2,SRC,BTK,YES1,TEK,FYN,CSF1R,MPL,FRK,LCK,AURKB,AXL,VEGFA,DDR2,AURKA,SLK,FGFR2,TXK,FGFR3,HCK,HPSE,AURKC,ROS1,PTPRB,NF1,HGF,FGR,RPS6KA3,PTCH1,MST1R,MET,RPS6KA1,SIK1,SIK3,MYD88,PDGFB,BLK,TLR8,IPO8,FGFR4,FGF4,RPS6KA2,PDGFC,PTK2,EML4,VEGFB,CDK19,EPHA8,EPHB1,HMOX1,BCR,IPO7,GALK2,CSF3R,LYN,STK24,EPHA4,PLK4,ITK,EPHB4,IGF1,IGF2…	QUIZARTINIB,JNJ-42756493,LENVATINIB,ASP-3026,RUXOLITINIB,BEVACIZUMAB,PAZOPANIB,VANDETANIB,IMATINIB,CEDIRANIB,DASATINIB,TELBERMIN,TABERMINOGENE VADENOVEC,Fruquintinib,SORAFENIB,NINTEDANIB,SU-14813,CHEMBL306380,ENMD-2076,PLX-3397,OLARATUMAB,X-396,PAZOPANIB HYDROCHLORIDE,MOTESANIB,CAPMATINIB,MK-2461,SORAFENIB TOSYLATE,IBRUTINIB,REBASTINIB,CE-245677,CRIZOTINIB,CEP-5214,TG100-801,SUNITINIB MALATE,Hena…
22	402	DRD4,DRD2,DRD3,DRD5,LOH19CR1,CAMK2B,DRD1,IL2,DGAT2,GPR143,NR4A1,GUCY2C,QPCT,DLG4,CALY,QPRT,NNMT,MT-CO1	LOXAPINE SUCCINATE,CHEMBL285755,REMOXIPRIDE,RITUXIMAB,DOPAMINE,CHEMBL1255588,ASENAPINE MALEATE,HALOPERIDOL DECANOATE,TRIFLUOPERAZINE,CARPHENAZINE,METHYLERGONOVINE MALEATE,PERGOLIDE MESYLATE,LEVODOPA,NIACIN,HALOPERIDOL,THIORIDAZINE,ZUCLOPENTHIXOL,SB-773812,ROTIGOTINE,FLUPHENAZINE,ROXINDOLE,METOCLOPRAMIDE,AMISULPRIDE,SPIPERONE,PROCHLORPERAZINE,BLONANSERIN,E-FLUPENTIXOL,PIMOZIDE,ACETOPHENAZINE,ETILE…
104	403	CHRM2,CHRM1,ABCB4,CHRNA2,CHRM3,CHRM5,CHRM4,GUCA2A	DOXACURIUM,BENZQUINAMIDE,CHEMBL279453,ORTATAXEL,ROCURONIUM,GANTACURIUM,ACETYLCHOLINE CHLORIDE,4-DAMP,PROPANTHELINE,METHSCOPOLAMINE BROMIDE,BETHANECHOL,METHIXENE,CHEMBL1256682,SOLIFENACIN,ANISOTROPINE METHYLBROMIDE,CHEMBL99521,BIPERIDEN (CHEMBL1101),CHEMBL343357,PILOCARPINE,5-METHYLFURMETHIODIDE,PIRENZEPINE,IPRATROPIUM,DARIFENACIN,OXOTREMORINE,Tarafenacin,OXYBUTYNIN,PROMAZINE,BIPERIDEN LACTATE,ATR…
26	404	GRM1	CHEMBL1771389,CHEMBL39372,CHEMBL1951658,CHEMBL94631,CHEMBL174588,CHEMBL175643,CHEMBL1951683,CHEMBL2205915,CHEMBL369459,CHEMBL579062,CPCCOET,CHEMBL396712,CHEMBL254575,CHEMBL2205377,CHEMBL223869,CHEMBL241327,CHEMBL236994,CHEMBL2164551,CHEMBL1517556,CHEMBL1082810,CHEMBL502882,CHEMBL578995,SCH-58261,CHOLINE CHLORIDE
27	405	P2RY6	CHEMBL384527,CHEMBL1321988,PHENYRAMIDOL HYDROCHLORIDE,CHEMBL1199729,CHEMBL215294,CHEMBL507060,CHEMBL1162174
30	406	RXRG,TGM2,RXRA,NRIP1,RARA,BCL6,RBP3,NR2C2,TG,STAT2,RARG,CEACAM1,TGFB1,ALDH1A2,RARB,APOA2,RXRB,ALPL,RPE65,TP73,PML,MYB,THBS1,MST1,EGR2,HOXD1,CALR,CRABP2,APEX1,ALPPL2,SMAD2,HES1,OCLN,MDK,IFI27,RPS19,CEACAM3,FUS,GLI1,RARRES1,UMOD,NR2C1,AHR,APOD	ALITRETINOIN,TRETINOIN,FENRETINIDE,RETINOL,ADAPALENE,IRX-4204,ACIVICIN,ETRETINATE,ISOTRETINOIN,ARCITUMOMAB,TAZAROTENE,BEXAROTENE,TAMIBAROTENE,VESNARINONE,VOLASERTIB,LEVAMISOLE,EMIXUSTAT,ACITRETIN,CHEMBL439780,MOFAROTENE,METHYLCELLULOSE,EMIXUSTAT HYDROCHLORIDE,ARSENIC,ONALESPIB,SDX-101,CHEMBL2385269,CHEMBL358145,OLTIPRAZ,AMIFOSTINE,CEFTAZIDIME,CHEMBL288436,PALOVAROTENE,CHEMBL472172,METELIMUMAB,IRX…
31	407	PRSS2,PRSS3,KLK4	CHEMBL27885
32	408	HRH1	BROMODIPHENHYDRAMINE,DESLORATADINE,PHENIRAMINE,OXATOMIDE,HYDROXYZINE HYDROCHLORIDE,TRIMEPRAZINE TARTRATE,ANTAZOLINE PHOSPHATE,MEQUITAZINE,TRIPROLIDINE,AZATADINE,CHEMBL1554789,FEXOFENADINE,ACEPROMETAZINE,LEVOCABASTINE HYDROCHLORIDE,LY2624803,DIPHENHYDRAMINE,TRIPELENNAMINE,DIPHENHYDRAMINE CITRATE,OLOPATADINE HYDROCHLORIDE,CHEMBL287367,CLEMASTINE,CHEMBL361355,CINNARIZINE,HYDROXYZINE,CARBINOXAMINE MA…
326	409	PLA2G6,CLCNKB,CLCNKA,KCNT2	NIFLUMIC ACID
143	410	GPR17,P2RY14	PILOCARPINE HYDROCHLORIDE,CHEMBL1466483,CHEMBL1800685,UDP-GALACTOSE,CHEMBL228111,CHEMBL50267,URIDINE_DIPHOSPHATE,CHEMBL1162071,PHENYRAMIDOL
247	411	GRM7,GRM6,GRM4,ADGRB1,GRM8	DEXFOSFOSERINE,CHEMBL432038,TOLTERODINE,EGLUMEGAD,CHEMBL477396,CHEMBL33567,TRIAMCINOLONE DIACETATE,CHEMBL299683,CHEMBL41013,CHEMBL34453,CHEMBL284193,CHEMBL86508,CHEMBL3114673,LY-379268,CHEMBL66654,CHEMBL212233,CHEMBL1609272,CHEMBL1319383,CHEMBL1613220,CHEMBL277475,CHEMBL88612,DIMETHYLFORMAMIDE,CHEMBL473806,CHEMBL143210,CHEMBL1209431,CHEMBL578988,CHEMBL1488784
34	412	SMO	SARIDEGIB,SONIDEGIB PHOSPHATE,BMS-833923,GLASDEGIB,TALADEGIB,PATIDEGIB,PHA-665752,TAK-441,LEQ506,POSACONAZOLE
44	413	IL2RG,IL2RA,IL2RB,TPSD1,CD7,IL12RB2	DENILEUKIN DIFTITOX,DACLIZUMAB,AS-1409,INOLIMOMAB,CETIRIZINE,BASILIXIMAB,HUMAN INTERLEUKIN-2,LMB-2,L-778123,LENTINAN
139	414	RRM2,NR2E3,RRM1,TXNRD1,CIP2A,POLD1,POLA1,TXNRD3,EIF4E,XRCC1,POLE,RRM2B,CDA,BLM,SMARCA4,DUSP1,DCK,TXNRD2,POLB	HYDROXYUREA,FLUDARABINE PHOSPHATE,GEMCITABINE,CYTARABINE,TRIAPINE,MOTEXAFIN GADOLINIUM,GALLIUM NITRATE,FLUDARABINE,GEMCITABINE HYDROCHLORIDE,BRIVUDINE,CLOFARABINE,VINORELBINE BASE,DEOXYCYTIDINE,TEZACITABINE,TETRAHYDROURIDINE,NELARABINE
340	415	SSTR3,SSTR2,SSTR5,SSTR1,SSTR4,GRK3,CD2,EDN1,PKM,PTPN4	BUDESONIDE,AJMALINE,VAPREOTIDE,PASIREOTIDE,ALENDRONIC ACID,CHEMBL252764,PASIREOTIDE DIASPARTATE,PASIREOTIDE PAMOATE,CHEMBL327745,LANREOTIDE ACETATE,CHEMBL410596,ALEFACEPT,ALBUTEROL,OCTREOTIDE,LANREOTIDE,OBELIN,CHEMBL420060,SUBSTANCE P,ETIOCHOLANOLONE,CHEMBL421362,CORTISTATIN-14,THIOURACIL,CHEMBL1474351,TYRPHOSTIN 1,CANDESARTAN CILEXETIL,OCTREOTIDE ACETATE,SEGLITIDE,URAPIDIL,CHEMBL313938,CHEMBL205…
42	416	P2RX7	ACEBUTOLOL,GSK1482160,AZD9056,BENZONATATE,CHEMBL377219,CHEMBL2338352,CHEMBL255787,EVT401,CE-224535,CHEMBL550637,CHEMBL335550
71	417	NDUFB2,MT-ND4,MT-ND2,MT-ND1,NDUFB6,NDUFB9,NDUFA2,NDUFB8,NDUFB5,NDUFC2,NDUFS8,NDUFS2,NDUFAF3,NDUFB4,NDUFS1,NDUFA9,NDUFAF4,MT-ND5,NDUFS4,NDUFAB1,NDUFB1,NDUFA5,NDUFA7,NDUFA13,NDUFS5,NDUFB3,NDUFB10,NDUFS7,NDUFA8,NDUFA10,NDUFA12,MT-ND4L,NDUFAF1,NDUFV2,MT-ND3,NDUFA3,MT-ND6,NDUFA4L2,PRKAA2,NDUFA4,NDUFS3,NDUFV3,NDUFC1,NDUFA1,NDUFA11,NDUFAF2,NDUFB11,NDUFB7,NDUFV1,NDUFA6,NDUFS6	NV-128,METFORMIN HYDROCHLORIDE,ME-344
36	418	PSMB4,PSMB2,PSMD14,NPM1,PSMD2,PSMC2,PSMA2,PSMB8,PSMC5,PSMD13,PSMC6,PSMD11,PSMD4P1,PSMB3,PSMA8,PSMD3,PSMB1,PSMC1,PSMD6,PSMC3IP,PSMB10,PSMA6,PSMA5,SEM1,PSMD8,PSMB5,PSME2,PSMC1P1,PSMD1,PSMA3,PSMD10P2,PSMD9,PSMB9,PMAIP1,PSME3,PSMD10P3,PSMD12,PSMB7,PSMB11,PIPSL,PSMC3,PSME2P2,PSMA7,PSMD4,PSMA1,ADRM1,PSMB6,PSMD7,PSMC4,PSME1,PSMD5,PSMD10,PSMA4,PSME4,PSMF1,PSMD10P1	OPROZOMIB,CARFILZOMIB,IXAZOMIB CITRATE,BORTEZOMIB,IXAZOMIB,MARIZOMIB,DEGUELIN
187	419	KCNJ11,TLR7,KCNJ1,ABCC8,KCNJ10,ABCC9,KCNJ8,AQP1	GLIPIZIDE,IMIQUIMOD,BUSPIRONE,GLICLAZIDE,HYDROMORPHONE,CHLORPROPAMIDE,GLYBURIDE,NATEGLINIDE,THIAMYLAL,PINACIDIL HYDRATE,NAMINIDIL,GLIQUIDONE,REPAGLINIDE,MITIGLINIDE,ACETOHEXAMIDE,TOLBUTAMIDE SODIUM, STERILE,NORTRIPTYLINE,TOLBUTAMIDE,GLISOXEPIDE,TOLAZAMIDE,ISATORIBINE,SARAKALIM,LOXORIBINE,SILVER,NICORANDIL,DOCOSANOL
89	420	PIM3,PIM1,PIM2,HASPIN,HIPK2	VADIMEZAN,LGH-447,RUBOXISTAURIN,SGI-1776,AZD-1208,ISONICOTINIC ACID
166	421	CALCRL	TELCAGEPANT,RIMEGEPANT,ERENUMAB,CHEMBL756,UBROGEPANT,MK3207
92	422	CYSLTR2,CYSLTR1,CLIP2	URACIL MUSTARD,CINALUKAST,ZAFIRLUKAST,POBILUKAST,OXACILLIN,NEDOCROMIL,FOSCARNET SODIUM,CR-3465,PRACTOLOL,LEUKOTRIEN E4,IRALUKAST,PRANLUKAST,MONTELUKAST SODIUM,CHEMBL76399,SULUKAST,VERLUKAST,SR-2640
47	423	SYT2,VAMP2,VAMP1	BOTULINUM TOXIN TYPE B
241	424	CDK7,CDK8,CDK1,CDK9,CDK6,CDK5,CDK4,EIF2AK2,CDK18,CDK15,CDK17,CDK10,CDK11B,MAP3K7,CDKN3,CDK20,CDK12,CDK14,STK36,CDK3,CDK16,CDK13	BMS-387032,Roniciclib,TG-02,SELICICLIB,PHA-793887,PURVALANOL B,ALVOCIDIB,AG-24322,CHEMBL1802728,INDIRUBIN SULFATE,RG-547,CHEMBL261720,AT-7519,Riviciclib,CHEMBL1956070,AZD-5438,PURVALANOLA,INTERFERON ALFA-2B,G1T28-1,RIBOCICLIB SUCCINATE,CHEMBL1077979,RGB-286638,MILCICLIB,Voruciclib,CHEMBL1256911,CHEMBL1535371,CHEMBL80713,FASCAPLYSIN,QUINOXALINE1,CHEMBL261425,BOHEMINE,CHEMBL235641
272	425	ACHE,BCHE	SUXAMETHONIUM,RIVASTIGMINE,ISOFLUROPHATE,ACOTIAMIDE,ECHOTHIOPHATE,PHYSOSTIGMINE,TACRINE,NEOSTIGMINE,MALATHION,GALANTAMINE HYDROBROMIDE,DONEPEZIL,ECHOTHIOPHATE IODIDE,HEXAFLUORENIUM BROMIDE,PRALIDOXIME CHLORIDE,DEMECARIUM BROMIDE,PYRIDOSTIGMINE BROMIDE,PHENSERINE,EDROPHONIUM,AMBENONIUM,PRALIDOXIME,ITOPRIDE,EDROPHONIUM CHLORIDE,RIVASTIGMINE TARTRATE,TACRINE HYDROCHLORIDE,MAGNESIUM CHLORIDE,BAMBUTER…
50	426	EDNRB,EDNRA	AMBRISENTAN,MACITENTAN,CHEMBL3188091,BOSENTAN,A-192621,GALANTAMINE,ATRASENTAN,CHEMBL37860,ENRASENTAN,PD-156707,AVOSENTAN,NEBENTAN,ZIBOTENTAN,DARUSENTAN,ENDOTHELIN 2,PHOSPHOENOLPYRUVATE,ENDOTHELIN,TEZOSENTAN,DL-PHENYLALANINE,ATRASENTAN HYDROCHLORIDE,PARATHION,SARAFOTOXIN S6B,SITAXENTAN SODIUM,CHEMBL72410,CHEMBL37807,SARAFOTOXIN S6C,CLAZOSENTAN
251	427	ITGB7,ITGA4,FRA11F	FIRATEGRAST,VEDOLIZUMAB,SNAP-7941,NATALIZUMAB,GAMMA-AMINOBUTYRIC ACID,ETROLIZUMAB
276	428	CD3G,CD3D,CD3E,CD247	OTELIXIZUMAB,ERTUMAXOMAB,NI-0401,CATUMAXOMAB,MUROMONAB-CD3,VISILIZUMAB,BLINATUMOMAB,TEPLIZUMAB
24	429	ADRA1B,ADRA2A,ADRA1A,ADRA1D,SLC2A4,ADRA2B,ADRA2C,LEP,HYAL2,SLC22A1,CAST,SLC2A2	CHEMBL25554,ASENAPINE (CHEMBL3187365),SENREBOTASE,ERGOTAMINE TARTRATE,BROMOCRIPTINE,TAMSULOSIN,DAPIPRAZOLE,DROXIDOPA,OLANZAPINE,DEBRISOQUIN,PHENYLEPHRINE BITARTRATE,TERGURIDE,LEVOMEPROMAZINE,CHLORPROMAZINE,EPINEPHRINE,PHENYLPROPANOLAMINE,LOFEXIDINE,DEXMEDETOMIDINE,PROPIOMAZINE,CLONIDINE,APOMORPHINE,METHAMPHETAMINE,LISURIDE,CHEMBL88272,RAUWOLSCINE,OXYMETAZOLINE,CABERGOLINE,CHEMBL10332,FENOLDOPAM,P…
309	430	HCRTR1,HCRTR2	SERTINDOLE,DIOTYROSINE,SB-649868,ALMOREXANT,LEMBOREXANT,CHEMBL522758,CHLOROTRIANISENE,SUVOREXANT,METHAMPHETAMINE HYDROCHLORIDE,CHEMBL359632,CHEMBL2110363,OREXIN B,CHEMBL2413521,FILOREXANT,CHEMBL1334465,CHEMBL363743,CHEMBL291536
129	431	PSEN1,PSEN2,APH1B,PSENEN,NOTCH1,DLL4,APH1A,ACVR1,NCSTN,NOTCH4,AD5,BMPR1A,NOTCH3,NOTCH2	SEMAGACESTAT,CHEMBL247471,BEGACESTAT,CHEMBL480558,AVAGACESTAT,CHEMBL3186227,REGN-421,CHEMBL2159511,NIROGACESTAT,TARENFLURBIL,PINITOL,TAREXTUMAB,BRONTICTUZUMAB,CHEMBL2396778
53	432	CFTR	IVACAFTOR,LUMACAFTOR,QBW251,CHEMBL1372588,CHEMBL1949980,CHEMBL177991,CHEMBL1221576,TEZACAFTOR,APIGENIN,CHEMBL461939
222	433	MME	CANDOXATRIL,CHEMBL3307195,OMAPATRILAT,FASIDOTRIL,FASIDOTRILAT,CHEMBL3187812,CANDOXATRILAT,SACUBITRIL,THIORPHAN
327	434	GCK	SITAXENTAN,LONIDAMINE,CHEMBL3219124
59	435	CCKAR	CHEMBL1269257,CERULETIDE,PD-170292,LINTITRIPT,DEXLOXIGLUMIDE,CHEMBL3184070,CERULETIDE DIETHYLAMINE,CHEMBL293226,CHEMBL269016,CHEMBL156559,TARAZEPIDE,CHEMBL400111,CHEMBL1269258
164	436	NR3C1,ANXA1,PLA2G4A,SERPINA6,PLA2G1B,IL17RA,IL17RB,HMOX2,CCL5,CD163	FLUTICASONE PROPIONATE,BETAMETHASONE BENZOATE,VAMOROLONE,RIMEXOLONE,FLUOROMETHOLONE,LOTEPREDNOL ETABONATE,METHYLPREDNISOLONE ACETATE,AMITRIPTYLINE,HYDROCORTAMATE,MILTEFOSINE,FLURANDRENOLIDE,CLOCORTOLONE ACETATE,FLUTICASONE,BETAMETHASONE,BECLOMETHASONE,FOSDAGROCORAT,DIFLORASONE,MOMETASONE,PARAMETHASONE,TRIAMCINOLONE ACETONIDE,FLUNISOLIDE,FLUTICASONE FUROATE,FLUMETHASONE PIVALATE,FLUOCINONIDE,HYDRO…
269	437	CXCR2,CXCR1,CD55,CYR61	MECHLORETHAMINE HYDROCHLORIDE,DANIRIXIN,NAVARIXIN,NAVARIXIN HYDRATE,MEPHENTERMINE,Ladarixin,REPARIXIN,CHEMBL411250,ELUBRIXIN,CHEMBL239767,BENZPIPERYLON,CHOLINE ALFOSCERATE
62	438	C1S,SERPING1	ROMIPLOSTIM,CONESTAT ALFA,TANAPROGET
75	439	KCNJ5,KCNJ6,KCNJ9,KCNJ3	SCH-23390,FLUPIRTINE,CHEMBL2409106
177	440	TPH1,C1QB,TPH2	ROPINIROLE,FENCLONINE,TELOTRISTAT ETHYL,CHEMBL472222,TELOTRISTAT,FENFLURAMINE
64	441	BDKRB1	BI113823,CHEMBL80472,CHEMBL416340,CHEMBL408846,CHEMBL2018875,MK0686,KETOROLAC,BRADYKININ,CHEMBL2311192,Safotibant,CHEMBL2370700,CHEMBL415848,CHEMBL273869
65	442	ACE2	CHEMBL260273,CHEMBL429844,LISINOPRIL
68	443	PNP,IL1R2	FORODESINE HYDROCHLORIDE,ULODESINE,FORODESINE
69	444	F10	IDRAPARINUX,LETAXABAN,IDRAPARINUX SODIUM,OTAMIXABAN,BETRIXABAN,ERIBAXABAN,APIXABAN,RIVAROXABAN,EDOXABAN,EDOXABAN TOSYLATE,NONACOG ALFA,CHEMBL1271162
70	445	IDO1	NORHARMANE,GLYMIDINE,EPACADOSTAT,TRYPTANTHRIN,CHEMBL584991
214	446	TPMT,PPAT	AZATHIOPRINE,AZATHIOPRINE SODIUM,MERCAPTOPURINE HYDRATE
148	447	KCNQ1,HNF4A,KCNB2,KCNA1,KCNH2,KCNH4,KCNQ2,KCNS3,KCNC4,KCNA7,KCNA4,KCNA6,KCNA10,KCNC2,KCNA5,KCNH7,KCNG2,KCNA2,ERG,KCNS2,KCNF1,KCNH8,KCNH6,KCNJ13,KCNV2,KCNG1,KCNG3,KCNQ5,KCNC3,KCNQ3,KCNH1,KCNA3,KCND3,KCNH3,KCND1,KCNJ14,KCNQ4,KCNC1,KCNH5,KCNS1,KCNB1,KCND2,KCNV1,FGF6	DALFAMPRIDINE,BUPIVACAINE,FLECAINIDE,ASTEMIZOLE,GUANIDINE HYDROCHLORIDE,PROPAFENONE,NERISPIRDINE,ROTTLERIN,AMIODARONE,DISOPYRAMIDE,DOFETILIDE,SOTALOL,TEDISAMIL,FLINDOKALNER,CHEMBL116590,ANDROSTENEDIONE,DRONEDARONE,SOTALOL HYDROCHLORIDE,MOXIFLOXACIN,CHEMBL1474918,CHEMBL317935,RESINIFERATOXIN,EZOGABINE,CHEMBL182977,LINOPIRDINE,LINOLEIC ACID,CHEMBL342375,CHEMBL1418045,CHEMBL406931,CHEMBL298475,IBUTI…
73	448	SLC6A9	CHEMBL551223,CHEMBL59821,ALLYLESTRENOL,CHEMBL26512,CHEMBL180966,CHEMBL1939495
9	449	TNF	CROMOLYN SODIUM,PRAZOSIN HYDROCHLORIDE,ONERCEPT,ADALIMUMAB,AZ-9773,DERSALAZINE,CERTOLIZUMAB PEGOL,AFELIMOMAB,GOLIMUMAB,TALACTOFERRIN ALFA,NERELIMOMAB,PLACULUMAB,MEROPENEM,LENERCEPT,DELMITIDE,OZORALIZUMAB,PEGSUNERCEPT,TIMOLOL MALEATE,CHEMBL219629
3	450	SIGMAR1,PGRMC1	CHEMBL222301,RIMCAZOLE,DEXTROMETHORPHAN POLISTIREX,CHEMBL2311194,REL-PENTAZOCINE,CHEMBL294144,TENECTEPLASE,NALUZOTAN,DEXTROMETHORPHAN HYDROBROMIDE MONOHYDRATE,CHEMBL143360,[11C]SA4503,PENTAZOCINE LACTATE,PENTAZOCINE HYDROCHLORIDE
76	451	JAK2,TYK2,JAK1,JAK3,PTK2B,NUAK1,STK4	BMS-911543,CHEMBL3116050,PF-562271,FEDRATINIB,RUXOLITINIB PHOSPHATE,AZD-1480,TOFACITINIB CITRATE,NS-018,CHEMBL21156,BARICITINIB,PIBOSEROD,FILGOTINIB,ITACITINIB,CHEMBL458997,Cerdulatinib,PAROXETINE,PACRITINIB,GANDOTINIB,AC-430,DEFACTINIB,CHEMBL2062804,XL-019,GLPG-0555,DECERNOTINIB,TRICETAMIDE,PF-04965842,PEFICITINIB,LS-104,RP-6530,WHI-P131,UPADACITINIB,CHEMBL384759,SOLCITINIB,TASOCITINIB,INCB-0479…
78	452	INSR	INSULIN ZINC SUSP RECOMBINANT HUMAN,INSULIN SUSP PROTAMINE ZINC PURIFIED PORK,INSULIN ZINC SUSP BEEF,INSULIN ASPART,INSULIN SUSP ISOPHANE RECOMBINANT HUMAN,INSULIN ZINC SUSP PURIFIED PORK,INSULIN GLARGINE,INSULIN LISPRO PROTAMINE RECOMBINANT,INSULIN HUMAN,INSULIN DEGLUDEC,INSULIN LISPRO,INSULIN DETEMIR,INSULIN GLULISINE,RACLOPRIDE,INSULIN ZINC SUSP EXTENDED PURIFIED BEEF,INSULIN SUSP PROTAMINE ZI…
79	453	IL6R,IL11RA,IL6ST,CD8B2	TOCILIZUMAB,OPRELVEKIN,SARILUMAB,SIRUKUMAB,SA237,VOBARILIZUMAB
80	454	CHRNA7	CHEMBL257591,PHA-543613,CHEMBL134713,CHEMBL403858,CHEMBL195345,TC-6987,BRADANICLINE,PNU-282987,AZD0328,APN1125,ENCENICLINE,AQW051,AVL-3288,JNJ-39393406,ND0801,SSR180711,ABT-126,ABT-107
350	455	FZD2,FZD8,FZD7,FZD1,FZD5	VANTICTUMAB,IPAFRICEPT
133	456	KCNJ4,ZACN,ARVD3,GLRA3,ALMS1,GLRB,AKR1B1P4,TRPM1	SPERMIDINE,GADOBENATE DIMEGLUMINE,ZINC ION,BILOBALIDE,PICROTOXININ,MINOXIDIL,TROPISETRON,CHEMBL464651,PICROTIN,WIN-552122,CHEMBL497392,TUBOCURARINE,CHEMBL1179605,STRYCHNINE,TAURINE,IVERMECTIN,TENIDAP
81	457	NTSR1,NTSR2	CHEMBL23576,REMINERTANT,LEVOCABASTINE,NEUROTENSIN
82	458	CHRNG,CHRNA1,CHRNE,CHRND,CHRNB1	ROCURONIUM BROMIDE,METOCURINE IODIDE,CISATRACURIUM BESYLATE,PIPECURONIUM BROMIDE,RAPACURONIUM BROMIDE,TUBOCURARINE CHLORIDE,VECURONIUM BROMIDE,MIVACURIUM CHLORIDE,GALLAMINE TRIETHIODIDE,SUCCINYLCHOLINE CHLORIDE,GALLAMINE,DOXACURIUM CHLORIDE,DECAMETHONIUM BROMIDE,ATRACURIUM BESYLATE,PANCURONIUM,PANCURONIUM BROMIDE
8	459	FPR1,FPR3	CHEMBL1770298,PROPANOL,CHEMBL1329101,PREDNISOLONE ACETATE,PROPYLENE GLYCOL,CHEMBL1290251,SPINORPHIN,PYROPHOSPHORIC ACID,PUTRESCINE,CYCLOSPORIN H,N-FORMYLMETHIONYL-LEUCYLPHENYLALANINE,NORETHINDRONE ACETATE,CHEMBL1770295,CHEMBL1770297
83	460	TSHR	THYROTROPIN ALFA,CEPHAPIRIN,JUGLONE
84	461	DHODH	LEFLUNOMIDE,TERIFLUNOMIDE
98	462	PRKCB,PRKCE,PRKCG,PRKG1,PRKCH,PRKCA,PRKCD,PRKD3,PRKCQ,PRKAR2B,PRKD1,PRKD2,PAK5,BCOR,PRKCZ,PRKCI,PRKACB,MARK1,PRKX,PAK6,PRKACA,PRRT2,GRK4,MARK3,GRK1,PAK4,GRK6,GRK7,PRKACG,CSRP2P1,CSRP2	BRYOSTATIN,CHEMBL1236539,GSK-690693,MIDOSTAURIN,BALANOL,SEBACIC ACID,SOTRASTAURIN,RO-316233,CEP-2563,CHELERYTHRINE,(7S)-HYDROXYL-STAUROSPORINE,ENZASTAURIN,INGENOL MEBUTATE,GO-6976,APRINOCARSEN SODIUM,TICLOPIDINE,SOTRASTAURIN ACETATE,CHEMBL366266,PF-03758309,CHEMBL297784,CHEMBL104264,DELCASERTIB
153	463	HRH2	IMPROMIDINE,BURIMAMIDE,ARPROMIDINE,CHEMBL513056,CIPROXIFAN,CONESSINE,BETAZOLE,CHEMBL472273,EPINASTINE,HISTAMINE,TIOTIDINE,METHANTHELINE BROMIDE,BETAZOLE HYDROCHLORIDE,RANITIDINE HYDROCHLORIDE,CLOBENPROPIT,AMTHAMINE,CIMETIDINE HYDROCHLORIDE,RANITIDINE BISMUTH CITRATE
315	464	PTH1R,PTH2R	TERIPARATIDE,CHEMBL97450,NEFAZODONE,PARATHYROID HORMONE,N,N-HEXAMETHYLENEAMILORIDE,TERIPARATIDE ACETATE
86	465	GGPS1	CHEMBL54004,MINODRONIC ACID,CHEMBL419627,CHEMBL86513,CHEMBL416301,CHEMBL494896,CHEMBL495315,CHEMBL259026,CHEMBL493443,DIGERANYL BISPHOSPHONATE,CHEMBL262616,CHEMBL411274,CHEMBL291314,CHEMBL71360
87	466	FFAR1,FFAR4,PLD2	PALMITIC ACID,MYRISTIC ACID,CYCLOBENZAPRINE,CHEMBL449588,CHEMBL99951,GW9508,FASIGLIFAM,GRIFOLIC ACID,CHEMBL2386353,OLEIC ACID,CHEMBL1254577,CHEMBL598,LY2881835,LINOLENIC ACID,PYROGALLOL,CHEMBL1829173
300	467	LSS	CHEMBL304858,MEDROXYPROGESTERONE ACETATE,CHEMBL2219824,VISNAGIN,CHEMBL481608,CHEMBL2164238,CHEMBL516921
322	468	KLK1,KLKB1	ECALLANTIDE
132	469	NPY2R,ANXA3,ANXA2P3,ANXA5,NPFFR1,PRLHR,NPY4R	LUTROPIN ALFA,CHEMBL435278,OBINEPITIDE,CHEMBL1774204,CHEMBL429731,CHEMBL332347,CHEMBL17639,CHEMBL2165920,NAPHTHALENE,CHEMBL21283,2-AMINO-1-METHYL-6- PHENYLIMIDAZO[4,5- B]PYRIDINE,PHENYLPYRUVATE,TM30339,BETA-LAPACHONE,CHEMBL122264,CHEMBL2110365,CHEMBL1421016,CHEMBL1672380
77	470	BRD4,BRD3,BRD2	CHEMBL3086883,CHEMBL1232461,APABETALONE,LY-294002,CHEMBL3220860,CHLORMEZANONE,CHEMBL2153434,CHEMBL1958337,CHEMBL2017291,CHEMBL2431090,CHEMBL2335153,CHEMBL1828986,CHEMBL1738777,CHEMBL2179387
90	471	CASR	TECALCET HYDROCHLORIDE,CINACALCET HYDROCHLORIDE,CINACALCET,ENCALERET,CHEMBL180672,VELCALCETIDE,ASP7991,LOFEPRAMINE,NORLEUCINE,STRONTIUM RANELATE,CALINDOL,RONACALERET,FORMALDEHYDE,CHEMBL1084513,CHEMBL194764,TECALCET
295	472	PRMT3,PRMT1,PRMT8,CARM1,PRMT6	CHEMBL2325441,PSEUDOEPHEDRINE,PREGNENOLONE,CHEMBL468927
5	473	HRH4	IMPROGAN,THIOPERAMIDE,CHEMBL12704,TOREFORANT,IMMEPIP,CHEMBL46296,CHEMBL1275655,CHEMBL1196470,CHEMBL185951,IODOPHENPROPIT,JNJ-7777120,N-METHYLHISTAMINE,DIMAPRIT,PF-03893787,CHEMBL26116,2-METHYLHISTAMINE,UR-63325,4-METHYLHISTAMINE,CHEMBL67601,METHIMEPIP
91	474	EPOR	METHOXY POLYETHYLENE GLYCOL-EPOETIN BETA,DARBEPOETIN ALFA,PEGINESATIDE,PEGINESATIDE ACETATE
102	475	FPR2,ASIC2	LIPOXIN A4,CHEMBL482796,AMODIAQUINE HYDROCHLORIDE,CAFFEINE, CITRATED,CHLORPROMAZINE HYDROCHLORIDE,CHEMBL185515,CHEMBL402643,CHEMBL379761,CHEMBL1289260,ASPARAGINE
93	476	TRPV1	PAC-14028,CHEMBL104028,SB-705498,MR-1817,AMG-517,NGD-8243,CHEMBL195789,CHEMBL441472,CHEMBL2386188,MAVATREP,ZUCAPSAICIN,JTS-653,PIPERINE,GRC-6211,DWP05195,CHEMBL120735,ABT-102,CAMPHOR,AZD1386,SYL-1001,PHE377,XEN-D0501,CHEMBL122413,CAPSAZEPINE,SAF312,CHEMBL254778,IODORESINIFERATOXIN
28	477	IL10,TRPM3,PTGS1,CPT2,MPO,PTGS2,PTGIS,ASIC3,GHRL,ALB,ALOX5,CD83,ACAT1,BRD1,SLC5A8,CYP2C9,IL7,IRS2,UGDH,TAF1,UGT1A10,PDPK1,PDK1,UGT1A6,FES,MT2A,CDX2,SLC1A3,MARK2	MEFENAMIC ACID,SUPROFEN,MECLOFENAMIC ACID,TOCOPHEROL ACETATE,MESALAMINE,MELOXICAM,IBUPROFEN,PHENYLBUTAZONE,NIMESULIDE,ASPIRIN,BX-795,NEPAFENAC,SALICYLIC ACID,ACETAMINOPHEN,ROFECOXIB,RALTITREXED,BALSALAZIDE DISODIUM,NAPROXEN ETEMESIL,OXAPROZIN,BISMUTH SUBSALICYLATE,SULFASALAZINE,PIOGLITAZONE,IBUPROFEN LYSINE,KETOPROFEN,OXYPHENBUTAZONE,DICLOFENAC,NAPROXEN,PIROXICAM,OXAPROZIN POTASSIUM,BROMFENAC SOD…
176	478	MC4R,MC1R,MC3R,MC5R,THBS2	CORTICOTROPIN,CHEMBL329011,AFAMELANOTIDE,CHEMBL339053,SETMELANOTIDE,CHEMBL2096742,MELATONAN,CHEMBL358015,Modimelanotide,BREMELANOTIDE,CHEMBL11348,PF-00446687
101	479	CNR1	Drinabant,IBIPINABANT,AZD2207,SURINABANT,TEBIPENEM,OTENABANT,NABOCTATE,TARANABANT,CHEMBL283206,CHEMBL2153670,CHEMBL411481,CHEMBL1553629
106	480	F2	LEPIRUDIN,DABIGATRAN,BIVALIRUDIN,CHEMBL282457,XIMELAGATRAN,DESIRUDIN,ARGATROBAN,DABIGATRAN ETEXILATE MESYLATE,MELAGATRAN
107	481	TRPV4	CHEMBL2133556,CHEMBL2324347,GSK2798745
109	482	CNR2	Tedalinab,NABILONE,PRS-211375,GW842166X,DRONABINOL,NONABINE,CHEMBL2019090,LY2828360,SAD448,APD371
110	483	BDKRB2	ICATIBANT,ANATIBANT,ICATIBANT ACETATE,LABRADIMIL,Fasitibant chloride
99	484	FOLR1	FARLETUZUMAB,VINTAFOLIDE,TETRAHYDROFOLATE
307	485	LHCGR	GOSERELIN,HUMAN LH,GTx-758,ISOPROPAMIDE
206	486	ATP1A1,FXYD2,ATP1A3,ATP1B2,ATP1A2,ATP1A4,ATP1B3,ATP1B1,SLCO4C1	OUABAIN,DIGOXIN,ACETYLDIGITOXIN,ALMITRINE,DESLANOSIDE,CICLOPIROX,DIGITOXIN,CHEMBL38827,CHEMBL444449
284	487	RXFP2,RXFP3,RXFP1,RXFP4	RELAXIN,ACETOHYDROXAMIC ACID,ALBENDAZOLE,SERELAXIN,DIPHENYLACETIC ACID
111	488	CHRNA3,CHRNB4	TC-6499,VARENICLINE,PENTOLINIUM TARTRATE,MECAMYLAMINE HYDROCHLORIDE,LARAZOTIDE ACETATE,ASM-024,TRIMETHAPHAN CAMSYLATE
13	489	NAT1,HTT	TRAZODONE HYDROCHLORIDE,PSEUDOEPHEDRINE POLISTIREX,DESVENLAFAXINE,DASOTRALINE,CHEMBL1256998,SIBUTRAMINE HYDROCHLORIDE,AMOXAPINE,MAPROTILINE HYDROCHLORIDE,ZACOPRIDE,NEFAZODONE HYDROCHLORIDE,GSK163090,LEVOMILNACIPRAN HYDROCHLORIDE,CHEMBL33884,CHLORPHENTERMINE HYDROCHLORIDE,MILNACIPRAN HYDROCHLORIDE,ATOMOXETINE HYDROCHLORIDE,PSEUDOEPHEDRINE SULFATE,MAZINDOL,CHEMBL544755,VENLAFAXINE HYDROCHLORIDE,DES…
197	490	IFNAR1,IFNAR2,MBP,IFNA1	INTERFERON BETA-1B,INTERFERON ALFA-2A,PEGINTERFERON ALFA-2A,INTERFERON ALFA-N3,RUTIN,INTERFERON ALFA-N1,INTERFERON ALFACON-1,INTERFERON BETA,INTERFERON BETA-1A,PEGINTERFERON BETA-1A,INTERFERON ALFA,ALBINTERFERON ALFA-2B,RONTALIZUMAB,SIFALIMUMAB
52	491	HTR3D,HTR3B,HTR3A,HEXB,HTR3C,HTR3E,PPY	PUMOSETRAG,CILANSETRON,VORTIOXETINE HYDROBROMIDE,GRANISETRON,DOLASETRON,ESMIRTAZAPINE,CHEMBL1188853,(R)ZACOPRIDE,GRANISETRON HYDROCHLORIDE,RG3487,CHEMBL266591,TEDATIOXETINE,CISAPRIDE,ESTRAMUSTINE,PHENYL BIGUANIDE,ONDANSETRON,Dolasetron Mesylate,ONDANSETRON HYDROCHLORIDE,ALOSETRON HYDROCHLORIDE,CHEMBL28992,MOSAPRIDE,QUIPAZINE,ALOSETRON,PALONOSETRON,CORTISONE,PALONOSETRON HYDROCHLORIDE,LERISETRON
51	492	CRHR2,CRHR1	PEXACERFONT,CHEMBL270738,SSR125543,EMICERFONT,VERUCERFONT,SAUVAGINE,ONO-2333Ms,CHEMBL44698,ANTALARMIN
258	493	HSD3B1,HSD3B2	TRILOSTANE
115	494	RORB,RORC	CHEMBL89241,CHEMBL104049,CHEMBL169046,JTE-151
116	495	PZP	NORETHINDRONE,ESTRAMUSTINE PHOSPHATE
119	496	CD86,CXCL8,CYP2J2	TERFENADINE,PAMIDRONIC ACID,CIDOFOVIR,ALUMINUM HYDROXIDE,FOSCARNET,ABX-IL8,HuMax-IL8,TALC,CEFTRIAXONE
179	497	SPHK1,SPHK2	IDRONOXIL,CHEMBL2158685,CHEMBL2158686
123	498	TNFSF13,TNFSF13B	ATACICEPT,BLISIBIMOD,TABALUMAB,BELIMUMAB,BRIOBACEPT
220	499	MMP2,MMP9,MMP14,MMP8,MMP13,MMP3,MMP7,MMP17,ADAM9,MMP1,MMP25,MMP26,MMP16,MMP15,ADAM12,MMP12	ANDECALIXIMAB,ILOMASTAT,DOXYCYCLINE HYDRATE,MARIMASTAT,TANOMASTAT,REBIMASTAT,PRINOMASTAT,CGS-27023A,INCYCLINIDE,CHEMBL181244,DOXYCYCLINE,MEGLUMINE,URIDINE DIPHOSPHATE GLUCOSE,DOXYCYCLINE CALCIUM,DOXYCYCLINE HYCLATE,BATIMASTAT,CHEMBL327002,CIPEMASTAT,CHEMBL222002,SOLIMASTAT,CHEMBL116757,CHEMBL117225,CHEMBL507420
124	500	SLC18A2	LISDEXAMFETAMINE DIMESYLATE,DEXTROAMPHETAMINE SACCHARATE,RESCINNAMINE,DIHYDROTETRABENAZINE,DEXTROAMPHETAMINE SULFATE,VALBENAZINE,DEXTROAMPHETAMINE ADIPATE,BENZPHETAMINE HYDROCHLORIDE,LOBELINE,PHENOLPHTHALEIN
74	501	CHRNA4,CHRNB2,AMH,CHRNA5,CHRNA6	MAPROTILINE,CHEMBL3103988,EPIBATIDINE,MECAMYLAMINE (CHEMBL267936),SOFINICLINE,BENZTROPINE MESYLATE,CHEMBL407217,AZD1446,CP-601927,ALTINICLINE,ISPRONICLINE,RIVANICLINE,POZANICLINE,VARENICLINE TARTRATE,ABT-560,ATRACURIUM,CHEMBL1201135,DEXEFAROXAN,TC-2216,TEBANICLINE TOSYLATE,NICOTINE POLACRILEX,HEXAMETHONIUM,DEXMECAMYLAMINE,CHEMBL490153,DIANICLINE,CHEMBL1876219
61	502	CCKBR	CHEMBL329305,L-365260,Netazepide,L-740093,CI-988,LORGLUMIDE,DEVAZEPIDE,CHEMBL289498,CHEMBL515288,ITRIGLUMIDE,ISOTHIPENDYL
10	503	DHFR,GART,RFC1	PRALATREXATE,PEMETREXED DISODIUM,PERFOSFAMIDE,PEMETREXED (CHEMBL1201258),TRIMETREXATE,CHLOROGUANIDE,METHOTREXATE SODIUM,AMINOPTERIN,METOPRINE,ICLAPRIM,CHLORPROGUANIL,TALOTREXIN
156	504	TACR2	CHEMBL504548,ALRESTATIN,NEUROKININ B,CHEMBL507824,DNK333,SAREDUTANT,NEPADUTANT,NEUROKININ A,CHEMBL295770,CHEMBL473773,CHEMBL417572,CHEMBL334721,TALNETANT,Ibodutant,OSANETANT,CHEMBL2110370,CHEMBL174356
131	505	NFKB2,NFKB1,NAMPT	OMTRIPTOLIDE SODIUM,TEGLARINAD CHLORIDE,BARDOXOLONE
287	506	GPR139	L-PHENYLALANINE,TRYPTOPHAN
262	507	PI3,CATSPER2,PAX2,CATSPER3,PMP22,CATSPER1,CATSPER4,ATF3,SLCO2A1,NME2	DINOPROSTONE,PROGESTERONE,ALPROSTADIL,MIBEFRADIL,CHEMBL56543,CHEMBL1551597
352	508	SERPINC1,SERPIND1	DALTEPARIN SODIUM,SULODEXIDE,ENOXAPARIN SODIUM,FONDAPARINUX (CHEMBL1201202),HEPARIN CALCIUM,TINZAPARIN SODIUM,FONDAPARINUX SODIUM,ARDEPARIN SODIUM,DANAPAROID SODIUM,SEMULOPARIN SODIUM
136	509	OXER1	CHEMBL1682258,YOHIMBINE HYDROCHLORIDE,5-OXO-ETE,CHEMBL164813
40	510	NPEPPS,XPNPEP2,RNPEP,ERAP1,METAP1,RNPEPL1,METAP1D,C9ORF3,LVRN,METAP2,XPNPEP1,XPNPEP3,LAP3,ERAP2,DNPEP,NPEPL1,ENPEP,LNPEP	ANTAQ,TOSEDOSTAT
45	511	CXCR3,ACKR3	BICARBONATE,ATROPINE SULFATE,ROLOFYLLINE (CHEMBL52333),CHEMBL351042,PLERIXAFOR,DIOSCIN,CHEMBL1077819,CHEMBL460831
141	512	SIRT1	CHEMBL420311,CHEMBL257991,SPLITOMICIN
46	513	PPARA,PPARG,PPARD	NETOGLITAZONE,CER-002,REGLITAZAR,MK-0533,AVE0847,ICOSAPENT ETHYL,INT131,K-877,KD3010,FARGLITAZAR,INDEGLITAZAR,RIVOGLITAZONE,CHEMBL24458,BEZAFIBRATE,CIPROFIBRATE,LY-518674,Efatutazone hydrochloride,L-796449,CHEMBL510698,RAGAGLITAZAR,CHEMBL38508,AVE8134,TIROTUNDIN,CIGLITAZONE,CP-778875,NAVEGLITAZAR,IMIGLITAZAR,CLX-0921,GW501516,ALEGLITAZAR,CHEMBL88496,CHEMBL179330,LY-510929,GSK-9578,TESAGLITAZAR,GW…
285	514	SLC22A8,SLC22A6,SLC22A11	CEPHALOTHIN,PROBENECID,PRATOSARTAN,BUPROPION HYDROCHLORIDE
146	515	SNAP25	BOTULINUM TOXIN TYPE A PURIFIED NEUROTOXIN COMPLEX,INCOBOTULINUMTOXINA,ABOBOTULINUMTOXINA
147	516	GPR119	CHEMBL1775179,OLEOYL DOPAMINE,CHEMBL1081913,CHEMBL1951032,CHEMBL3093100,OLVANIL,HYDROCORTISONE ACETATE,CHEMBL3260505,CHEMBL1534468,OXYPHENONIUM BROMIDE,CHEMBL3093101,CHEMBL1775169,MEPERIDINE HYDROCHLORIDE,CORTISONE ACETATE,N-(2-HYDROXYETHYL)STEARAMIDE,CHEMBL3182200,DONEPEZIL HYDROCHLORIDE,ZARDAVERINE,CHEMBL123678
360	517	CCR8	PHENPROCOUMON,CHEMBL1883966
314	518	ABCB11,ABCA1	PROBUCOL,GLYCOCHENODEOXYCHOLIC ACID
151	519	CGB3,TNFRSF13B	ARDENERMIN
160	520	ATP4A,CYP2C19,HDC,ATP4B	ESOMEPRAZOLE,OMEPRAZOLE,DEXLANSOPRAZOLE,DOXEPIN,LIXIVAPTAN,ESOMEPRAZOLE MAGNESIUM,CITALOPRAM,ESCITALOPRAM,CLOPIDOGREL,RABEPRAZOLE,CARISOPRODOL,LANSOPRAZOLE,PANTOPRAZOLE SODIUM,OMEPRAZOLE MAGNESIUM,RABEPRAZOLE SODIUM,ESOMEPRAZOLE STRONTIUM,ESOMEPRAZOLE SODIUM
154	521	BLVRB	CHEMBL473934,CHEMBL1208085,CHEMBL143820,ZARAGOZIC ACID A,CHEMBL258717,DIPIVEFRIN,CHEMBL515716,CHEMBL160318,CHEMBL490300,CHEMBL490890,CHEMBL422638,CHEMBL460895,CHEMBL460896
63	522	TAAR1,CARTPT	CHEMBL1669669,AMPHETAMINE,OCTOPAMINE,TYRAMINE,DEXTROAMPHETAMINE,CHEMBL158578,PHENETHYLAMINE,(R)-CYSTEINE
60	523	GJD4,OSGIN2,C6,GJB4,GJC2,GJA4,GJB2,C1R,GJE1,TRPM4,C8G,TRPM5,GJA8,ART1,PANX1,GJA1,GJB6,GJB3,GJB5,PANX3,C7,GJD2,GJD3,NAAA,GJA5	FLUFENAMIC ACID,CARBENOXOLONE,cA2,OCTANOL,SPERMINE
173	524	MAPK11,MAPK14,MAPK13,MAPK12,HSP90B1,MINK1,GAK	RWJ-67657,TALMAPIMOD,SB-220025,AMG-548,SC-80036,VX-702,PF-03715455,SEMAPIMOD,R-1487 (CHEMBL1766582),AZD-6703,Acumapimod,SB-203580,PIRFENIDONE,ARRY-797,PG-760564,TA-5493,SCIO-323,DILMAPIMOD,Pexmetinib,KC-706,BMS-582949,RALIMETINIB,LOSMAPIMOD,GSK-610677,DORAMAPIMOD,VK-19911,VX-745,Ro-3201195,PH-797804,RALIMETINIB MESYLATE,FX-005,PS-516895,AVE-9940,SD-0006,SB-202190,LY-3007113,PAMAPIMOD,AZD-7624,SB-…
161	525	GRM3,GRM2	CHEMBL2179319,CHEMBL108939,LY2969822,LY404039,CHEMBL40086,CHEMBL105296,CHEMBL1094763,CHEMBL605836,POMAGLUMETAD METHIONIL,CHEMBL2029821,EGLUMETAD,ISOSPAGLUMIC ACID,CHEMBL1629855,LY2979165,CHEMBL182371,CHEMBL595759,DECOGLURANT,CHEMBL321968,CHEMBL593013
163	526	GPBAR1	LITHOCHOLIC ACID,DEOXYCHOLIC ACID,CHENODIOL,BETULINIC ACID,CHOLIC ACID
162	527	DDC	3-HYDROXYBENZYLHYDRAZINE DIHYDROCHLORIDE,BENSERAZIDE,CARBIDOPA (CHEMBL1200748)
218	528	GPR55	RIMONABANT,CHEMBL476833,TRIFLUPROMAZINE,CHEMBL1385076,CP-55940,CHEMBL2062131,OLEOYLETHANOLAMIDE,CHEMBL1532240,CHEMBL306764,CHEMBL146346,2-ARACHIDONOYLGLYCEROL,CHEMBL1718432,CHEMBL187349,PALMIDROL
308	529	BACE1,BACE2	TERAZOSIN,CHEMBL2347208,CHEMBL2331712,CHEMBL2333941,PHENOXYBENZAMINE,VERUBECESTAT,CHEMBL2152903,ELENBECESTAT,CHEMBL2347211,CHEMBL2151141,CHEMBL2396989
128	530	ITGB1,ITGB3,ITGAV,ITGB5,MR1,ITGA5,ITGA2B,ITGA2,ITGB6,CD1A	EPTIFIBATIDE,TRIAMCINOLONE,DI17E6,INTETUMUMAB,BELAPERIDONE,ETARACIZUMAB,VOLOCIXIMAB,TIROFIBAN,CILENGITIDE,GANTOFIBAN,PF-04605412,CHEMBL88478,ABCIXIMAB,VALATEGRAST HYDROCHLORIDE,STX-100,TIROFIBAN HYDROCHLORIDE,TADOCIZUMAB,VATELIZUMAB,CHEMBL36326,RUSALATIDE ACETATE
240	531	PGR,PTK6	NORELGESTROMIN,ASOPRISNIL,ETONOGESTREL,TELAPRISTONE ACETATE,CHEMBL407848,DESOGESTREL,PROMEGESTONE,ULIPRISTAL,ULIPRISTAL ACETATE,DYDROGESTERONE,NORGESTIMATE,GESTODENE,DIENOGEST,CHEMBL1390,LONAPRISAN,PF-05019702,CHEMBL2311103,NORETHYNODREL
168	532	ADAM17,ADAM33,ADAM10	CHEMBL489100,CHEMBL148169,ADERBASIB,CHEMBL1630098,CHEMBL514958,APRATASTAT
291	533	CHEK1,CHEK2,CSNK1G1,CDS1	METHYL NONYL KETONE,PF-00477736,XL-844,SCH-900776,ISOGRANULATIMIDE,CHEMBL377312,LY-2606368,PREXASERTIB,RABUSERTIB,CHEMBL179583,RG-7602,RG-7741
88	534	P2RY11,P2RY12,P2RY13	CHEMBL1207514,CHEMBL369928,ADENOSINE DIPHOSPHATE,ELINOGREL,CHEMBL336208,REGRELOR,CLOPIDOGREL BISULFATE,TICLOPIDINE HYDROCHLORIDE,CHEMBL435402,CLOXYPENDYL,CANGRELOR TETRASODIUM,NICOTINIC ACID ADENINE DINUCLEOTIDE PHOSPHATE,CANGRELOR,p-Chloromercuribenzenesulfonate,PRASUGREL HYDROCHLORIDE,CHEMBL336292,IDOXURIDINE,CHEMBL335538,NADIDE,MEFLOQUINE,CHEMBL606240,REGRELOR DISODIUM,RB 2,CHEMBL2172275,CHEMB…
205	535	MLNR	MECLOFENAMATE SODIUM,ATILMOTIN,MOTILIN,MITEMCINAL,ALEMCINAL,CAMICINAL,CHEMBL299799,MITEMCINAL FUMARATE,CHEMBL51522
169	536	ADH1A,ADH1B,ADH1C,AKR1A1	FOMEPIZOLE
144	537	TNFRSF10B	Apomab,CONATUMUMAB,LEXATUMUMAB,TIGATUZUMAB,LBY-135,DROZITUMAB
268	538	CTSZ,CTSO	ODANACATIB
172	539	CYP26B1,CYP26C1,CYP26A1	TALAROZOLE,LIAROZOLE
152	540	IL6	SILTUXIMAB,CLAZAKIZUMAB,LEVOFLOXACIN,CDP-6038,LINEZOLID,ELSILIMOMAB,PF-04236921,OLOKIZUMAB
174	541	EPCAM	OPORTUZUMAB MONATOX,TUCOTUZUMAB CELMOLEUKIN,MINERAL OIL,ADECATUMUMAB,FOLINIC ACID,VB6-845,IGN-101,ING-1,CITATUZUMAB BOGATOX
175	542	AGTR2	CHEMBL189568,CHEMBL1885579,SPARSENTAN,AZILSARTAN MEDOXOMIL,AZILSARTAN,ANGIOTENSIN II,ANGIOTENSIN III,CYTOSINE
311	543	PLG,FGB,FGA,FGG,SLC27A1	FIBRINOLYSIN, HUMAN,RETEPLASE,ALTEPLASE,ALFIMEPRASE,DESMOTEPLASE,NYSTATIN,ANISTREPLASE,CHEMBL2016873,AMEDIPLASE,OXYMETHOLONE,STREPTOKINASE,DEFIBROTIDE SODIUM
19	544	NTRK1,NTRK2,NTRK3,HP	LESTAURTINIB,ENTRECTINIB,AZD-7451,ALTIRATINIB,ESTRADIOL,PLX-7486,AZD-6918,LOXO-101,CHEMBL2007421,PYRIDOXINE,TAVILERMIDE,CT-327
134	545	CGB5,GALR2,GALR1,GALR3,ADCY1	GALANIN,METHOXAMINE,CHEMBL541253,GALANTIDE,CHEMBL604991,METHACHOLINE CHLORIDE,METHYLENE BLUE,HESPERIDIN,PRIMAQUINE PHOSPHATE,GALMIC,DIPHEMANIL METHYLSULFATE,GOSSYPOL ACETIC ACID,BRETYLIUM TOSYLATE,ADENOSINE PHOSPHATE,CHEMBL450441,DIPHEMANIL,METHICILLIN,CHEMBL578514,LEUCINE,PAPAVERINE HYDROCHLORIDE,CHEMBL506495,METHIONINE,CHEMBL209497,LIPOIC ACID
334	546	PGD,STS	PENICILLAMINE,IROSUSTAT,TRIPTORELIN
170	547	CASP9,CASP8,CASP10,CASP5,CASP4,CASP1,CASP2,CASP7,CASP12,CASP6	NIVOCASAN,EMRICASAN,METHOHEXITAL,PRALNACASAN,BELNACASAN
180	548	ADGRG3	GSK239512,BECLOMETHASONE DIPROPIONATE,FAMOTIDINE,CHEMBL351231,CIPRALISANT,GALNON
181	549	SV2A	BRIVARACETAM,LEVETIRACETAM,SELETRACETAM
182	550	MAP3K9,MAP3K13,MAP3K12,MAP3K11,MAP3K10	CEP-1347,METARAMINOL
25	551	MS4A1	OCRELIZUMAB,OBINUTUZUMAB,IBRITUMOMAB TIUXETAN,TOSITUMOMAB,UBLITUXIMAB,OFATUMUMAB,VELTUZUMAB,YTTRIUM Y 90 IBRITUMOMAB TIUXETAN,LFB-R603
184	552	DBH,CSTP1	NEPICASTAT
185	553	NR1H4	OBETICHOLIC ACID,22(R)-HYDROXYCHOLESTEROL,Px-102,FEXARAMINE,TUROFEXORATE ISOPROPYL,GUGGULSTERONE,CHEMBL318457
48	554	CA1,CA2,CA12,CA7,KCNMA1,CA4,CA5A,CA6,CA14,CA3,CA13,CA5B,KCNU1,CCR6	DICHLORPHENAMIDE,INDISULAM,ACETAZOLAMIDE SODIUM,CHLORTHALIDONE,ETHOXZOLAMIDE,DORZOLAMIDE,SULPIRIDE,VALDECOXIB,TRICHLORMETHIAZIDE,CHLOROTHIAZIDE,ANDOLAST,ACETAZOLAMIDE,BRINZOLAMIDE,POLMACOXIB,METHAZOLAMIDE,BENZOLAMIDE,ETHINAMATE,CHEMBL1290115,SAR-566658,GALLIC ACID,METHOCARBAMOL,BMS-223131,DORZOLAMIDE HYDROCHLORIDE
227	555	MSH6,CD274,PDCD1,MSH2,MSH3,PMS2,MLH1,CX3CL1,HLA-DRA	IPILIMUMAB,PEMBROLIZUMAB,ATEZOLIZUMAB,NIVOLUMAB,AVELUMAB,DURVALUMAB,PROCARBAZINE,PIDILIZUMAB
366	556	ABAT,GPER1,SLC32A1	PYRIDOXAL PHOSPHATE,PYRUVATE,VIGABATRIN
188	557	CD38	ISATUXIMAB,SAR-650984,DARATUMUMAB,HuMax-CD38
190	558	GPR84	DODECANOATE,CHEMBL1233457,DECANOIC ACID
192	559	ENUR1,GUCY2F,CCK	DIAZOXIDE,DICLOXACILLIN,VIRGINIAMYCIN FACTOR M1
140	560	CCR2	MLN-1202,CENICRIVIROC,AZD2423,MEGLITINIDE,PF-04634817,CCX140,PLOZALIZUMAB,CHEMBL1593104,CHEMBL337246,CHEMBL432713
354	561	PTPRD	CIXUTUMUMAB,CUCURBITACIN I
333	562	PTPRF	ERLOTINIB HYDROCHLORIDE,ILLUDALIC ACID
142	563	RYR1,SPINT1,RYR3,RYR2,TRPM6,ST14,TBK1	ADENOSINE TRIPHOSPHATE,MAGNESIUM,RYANODINE,SURAMIN,DANTROLENE,DANTROLENE SODIUM,RUTHENIUM RED,PROCAINE
345	564	SLC6A5	BITOPERTIN,CHEMBL88588
194	565	AKR1B1	TOLRESTAT,ZOPOLRESTAT,URACIL,SORBINIL,ZENARESTAT,LIDORESTAT,TECTORIGENIN,RANIRESTAT
4	566	HDAC5,HDAC11,HDAC8,HDAC4,DDIT4,FHIT,HDAC3,HDAC7,KMT2A,HDAC9,HDAC1,HDAC6,HDAC2,MYC,ACADSB,HDAC10,CCNE1,BHLHE40,BAP1,POLG,DOT1L,HIST4H4,CDKN1C	CHEMBL1213492,PANOBINOSTAT LACTATE,CUDC-101,SCRIPTAID,BELINOSTAT,TRICHOSTATIN,TACEDINALINE,AMG-900,CHEMBL1851943,SODIUM PHENYLBUTYRATE,ALISERTIB,ROMIDEPSIN,DINACICLIB,ABEXINOSTAT,CUDC-907,DACINOSTAT,PANOBINOSTAT,VORINOSTAT,DEPUDECIN,VALPROIC ACID,ENTINOSTAT,CHEMBL100014,CHLAMYDOCIN,QUISINOSTAT,TUBACIN,BUTANOIC ACID,CHEMBL3110004,CHEMBL191482,CHEMBL1801250,APICIDIN,CHEMBL3087499,BUFEXAMAC,MOCETINO…
112	567	SPR,TACR1,GIF	APREPITANT,SERLOPITANT,CHEMBL131171,NOLPITANTIUM,BEFETUPITANT,Burapitant,FIGOPITANT,VESTIPITANT MESYLATE,PHYSALAEMIN,EZLOPITANT,CHEMBL339486,LANEPITANT,VESTIPITANT,CASOPITANT,CHEMBL352396,FOSAPREPITANT DIMEGLUMINE,TRADIPITANT,CHEMBL129683,FOSAPREPITANT,VOFOPITANT,CHEMBL1965818,ORVEPITANT,ROLAPITANT HYDROCHLORIDE,CHEMBL1885865,NETUPITANT,ROLAPITANT,DAVASAICIN
37	568	NR3C2	DESOXYCORTICOSTERONE PIVALATE,PF-03882845,DROSPIRENONE,FLUDROCORTISONE,EPLERENONE,FLUDROCORTISONE ACETATE,ONAPRISTONE,LY2623091,XL550,FINERENONE,MT-3995,DESOXYCORTICOSTERONE ACETATE,OXPRENOATE POTASSIUM
195	569	GLP1R	EXENATIDE,CHEMBL1210015,LIXISENATIDE,DULAGLUTIDE,LIRAGLUTIDE,PALIVIZUMAB,SEMAGLUTIDE,TASPOGLUTIDE,ALBIGLUTIDE
85	570	CACNA1F,GRP,GFAP,VIP,CACNA1C,NFE2L2,CACNG1,HSPA4,NTF3,ABCB1,RNASEH2A,CACNA1D,F8,CACNA1S,CACNA2D1,CAMK2G,CACNB1,SCG5,NEUROD1,NTS,MCOLN1,INPP1,TPCN2,SMOX,PCNA,LMO2,TPCN1,SP7,CMKLR1,UBE2D1,ARSB,DCN	VERAPAMIL,CAPSAICIN,DEFEROXAMINE,NIFEDIPINE,AMLODIPINE BESYLATE,LITHIUM,RANITIDINE,FELODIPINE,DILTIAZEM HYDROCHLORIDE,NIMODIPINE,AMLODIPINE,ELPETRIGINE,NISOLDIPINE,FLUTAMIDE,VERAPAMIL HYDROCHLORIDE,AZASERINE,IBUTILIDE,ISRADIPINE,DILTIAZEM MALATE,NICARDIPINE HYDROCHLORIDE,AMLODIPINE MALEATE,CLEVIDIPINE,DOMPERIDONE,AZD1305,ASCORBATE,CLOFAZIMINE,BISANTRENE (CHEMBL139554),NITRENDIPINE,THIABENDAZOLE,D…
196	571	DPEP1	CILASTATIN,CILASTATIN SODIUM
233	572	P2RY1	SCOPOLAMINE,CHEMBL255306,CHEMBL104784,CHEMBL1233797,2',3'-DIDEOXYADENOSINE TRIPHOSPHATE,CHEMBL2393201,CHEMBL1161861,CHEMBL255724,CHEMBL338790,CHEMBL153254,CHEMBL1364808,CHEMBL444278,CHEMBL1368696,CHEMBL574817
137	573	CXCR4	Burixafor,CHEMBL452864,MSX-122,METHIONINE SULFOXIDE,BKT140,CHEMBL518924,POL6326,CHEMBL460491,ULOCUPLUMAB,CTCE-9908,CHEMBL1088913
203	574	OPRL1	CEBRANOPADOL,LY2940094,TETRABROMOBENZOTRIAZOLE,CHEMBL437723,CHEMBL559569,CHEMBL2403218,CHEMBL150830,CHEMBL409969,J-113,397,NOCICEPTIN,CHEMBL140979
183	575	HMGCR	ATORVASTATIN CALCIUM,CHEMBL1165259,CHEMBL228528,ROSUVASTATIN CALCIUM,PITAVASTATIN CALCIUM,CHEMBL228955,CERIVASTATIN,FLUVASTATIN SODIUM,CHEMBL318707,CHEMBL1163804,CHEMBL1205894,PITAVASTATIN,CHEMBL133434,CHEMBL115307,CHEMBL489540,CHEMBL160102,CHEMBL101497,CERIVASTATIN SODIUM,PRAVASTATIN SODIUM,CHEMBL412295,MEVASTATIN,CHEMBL400874,CHEMBL161829,CHEMBL483819
329	576	AOC3	NOVOBIOCIN,CEFAZOLIN,VEPALIMOMAB
199	577	F2RL1	CHEMBL494303,TYLOSIN,NALBUPHINE,CHEMBL509819,BUNOLOL (CHEMBL293030),CHEMBL55242,CHEMBL493076
201	578	TGFBR1	NEOSTIGMINE BROMIDE,GALUNISERTIB,CHEMBL261454,CHEMBL1824446
16	579	GCGR	GLUCAGON HYDROCHLORIDE RECOMBINANT,GLUCAGON HYDROCHLORIDE,CHEMBL1933348,NITRACRINE,ADOMEGLIVANT,CROTEDUMAB,PF-06291874,SAR425899,CHEMBL179281,CHEMBL351772
202	580	NR1H2,NR1H3	PENTAZOCINE,24(S),25-EPOXYCHOLESTEROL,PAXILLINE,LXR-623,BMS-779788,CS-8080,BMS-852927,CHEMBL23296,CHEMBL171804,HYODEOXYCHOLIC_ACID,CHEMBL1093266,CHEMBL59030,DESMOSTEROL,T091317,CHEMBL493241
114	581	ESR2,ESR1,ESRRG,SHBG	OSPEMIFENE,IDOXIFENE,DIETHYLSTILBESTROL DIPHOSPHATE,CHEMBL282489,ESTRIOL,CR 1447,PRINABEREL,ESTRADIOL ACETATE (CHEMBL1200430),ACOLBIFENE,RALOXIFENE HYDROCHLORIDE,MK-6913,BAZEDOXIFENE,MF101,QUINESTROL,ESTROGENS, CONJUGATED SYNTHETIC A,SIVIFENE,DROLOXIFENE,ESTRAMUSTINE PHOSPHATE SODIUM,ESTROGENS, ESTERIFIED,SR16234 (CHEMBL3545210),ESTROGEN,FISPEMIFENE,NORGESTREL,ESTRADIOL CYPIONATE,DIENESTROL,RALOX…
105	582	BIRC3,XIAP,BIRC2,BIRC7	CHEMBL3108827,CHEMBL2431768,CHEMBL2063869,BIRINAPANT,CHEMBL126955,CHEMBL481422,CHEMBL504559
207	583	SLC29A1	DRAFLAZINE,PENTAGASTRIN,TICAGRELOR,NITROBENZYLMERCAPTOPURINE RIBONUCLEOSIDE,DILAZEP
237	584	IL13RA1,IL4R,IL13RA2	CINTREDEKIN BESUDOTOX,SILYBIN B,DUPILUMAB
238	585	TACR3	AMCINONIDE,CHEMBL480249,ELEDOISIN,AZD2624,SB-222200,KASSININ,SENKTIDE,CHEMBL1991816,CHEMBL221445,CHEMBL69367,CHEMBL44229,CHEMBL9843,CHEMBL275544
208	586	APP	GSK-933776,CRENEZUMAB,PONEZUMAB,CHEMBL468154,BAN2401,SOLANEZUMAB,ADUCANUMAB,BAPINEUZUMAB,PRIDINOL,GANTENERUMAB,VANUTIDE CRIDIFICAR,CAPROSPINOL,TRAMIPROSATE,BIIB-037
210	587	PLIN3,IDS	IDURSULFASE
267	588	TERT	OMACETAXINE MEPESUCCINATE,IMETELSTAT,IMETELSTAT SODIUM
211	589	NPY5R	FR-79620,VELNEPERIT,CHEMBL438914,S-237648
66	590	APOE,CYP2E1,MTOR,PIK3R2,F2R,GADD45A,KRAS,MGMT,BAX,CTLA4,MAP2K1,PIK3R1,NQO1,PIK3CG,PTEN,CYP3A43,PIK3R3,GSTP1,PIK3CA,PIK3CB,RPS6KB1,BDNF,ITGB2,CSF2RA,IFNG,PTGES3,BCL2,FGF2,NAT2,ATM,AKT1,GNAQ,ARAF,CCL17,PTHLH,EGFR,PIK3CD,ATP7A,ERBB2,STK11,CDKN2A,CP,PALB2,DKK1,PIK3C2G,IL17A,EIF2B1,MAP2K2,BRAF,PIK3R6,TAC1,CKM,MUC1,ME3,ERBB3,PLAU,TSHB,ATRX,ATIC,AKT3,PIK3C2B,PIK3C3,TOP2A,USP9Y,UGT1A4,CSF2,CYP19A1,B4GALN…	PREDNISONE,ISOFLAVONE,CHEMBL561708,PF-04691502,RIGOSERTIB SODIUM,DOXORUBICIN,CHLORAMBUCIL,PREDNISOLONE,EVEROLIMUS,IMGATUZUMAB,THIOGUANINE,ALCOHOL,SELUMETINIB,ZSTK-474,GLUCAGON,INTERFERON GAMA-1B,TG100-115,TEMSIROLIMUS,GINKGO,GANCICLOVIR,PICTILISIB,DAUNORUBICIN,INK-1117,TASELISIB,LY-2780301,EDARAVONE,SARGRAMOSTIM,CYCLOPHOSPHAMIDE,GENISTEIN,HYDROQUINONE,DEXAMETHASONE,WX-554,REBAMIPIDE,TEMOZOLOMIDE,…
54	591	ACE,DPP9	FOSINOPRIL SODIUM,ENALAPRIL MALEATE,SPIRAPRILAT,ENALAPRILAT,MOEXIPRIL,DESERPIDINE,BENAZEPRIL,FOSINOPRIL,SPIRAPRIL,PERINDOPRILAT,BENAZEPRIL HYDROCHLORIDE,TRANDOLAPRIL,IMIDAPRILAT,LISINOPRIL HYDRATE,QUINAPRILAT,CHEMBL1235767,MOEXIPRIL HYDROCHLORIDE,RAMIPRILAT,CILAZAPRIL,PERINDOPRIL ERBUMINE,PERINDOPRIL,TRANDOLAPRILAT,SPIRAPRIL HYDROCHLORIDE,BENAZEPRILAT,QUINAPRIL HYDROCHLORIDE,IMIDAPRIL,PERINDOPRIL…
204	592	HSP90AA2P,HSP90AB1,HSP90AA1,UGT1A	RETASPIMYCIN,CHEMBL2170470,TANESPIMYCIN,GANETESPIB,CHEMBL2204502,ALVESPIMYCIN,ALVESPIMYCIN HYDROCHLORIDE,CHEMBL553939,RETASPIMYCIN HYDROCHLORIDE (CHEMBL377559)
248	593	GATA2,CBL,ROCK1,ROCK2,PKN2,CBLB	FASUDIL,VEROSUDIL,Y-27632,GSK-269962A,SAR-407899 (CHEMBL3545341),AMA0076,SAR-407899 (CHEMBL1667969),CHEMBL406821,DE-104,NETARSUDIL,Y-39983,CHEMBL2005186
219	594	KCNN4,HPN,KCNN2,KCNN1	SENICAPOC,BENTIROMIDE,CHEMBL1709719,BENDROFLUMETHIAZIDE,CHEMBL510780,CHEMBL1671897,CHEMBL452887,CHEMBL453730,CHEMBL498270,CHEMBL1255655,HALOFANTRINE HYDROCHLORIDE,CHEMBL499968,APAMIN
215	595	FCER1G,MS4A2,FCER1A	R-112,OMALIZUMAB,BENZYLPENICILLOYL POLYLYSINE
318	596	SLC22A12,ABCC2,EED	SULFINPYRAZONE,ARHALOFENATE,LESINURAD
216	597	GRM5	LY545694,DIPRAGLURANT,Raseglurant,AZD2516,STX107,AZD2066,RG7342,ACAMPROSATE,FENOBAM,MAVOGLURANT,BASIMGLURANT
221	598	GHR	CHEMBL324218,PEGVISOMANT,SOMATREM,CHEMBL18872,IBUTAMOREN
259	599	CXCR6,TRPC6	HYPERFORIN,CHEMBL429298,CHEMBL13990
125	600	IGF1R,ETV6,ASNS	AEW-541,GANITUMAB,FIGITUMUMAB,MECASERMIN,BMS-754807,INSM-18,AVE-1642,CHEMBL401930,ASPARAGINASE,DALOTUZUMAB,PL-225B,MECASERMIN RINFABATE,ROBATUMUMAB,BIIB-022,DIMETHISTERONE,EMACTUZUMAB,KW-2450,HMPL-523,PICROPODOPHYLLOTOXIN
223	601	GPR183,RORA	CHEMBL497834,CHOLESTEROL,CHEMBL1231592
244	602	SLC5A1,SLC5A2,SLC5A4,SLC2A5,SLC2A3	GLUFOSFAMIDE,TOFOGLIFLOZIN,EMPAGLIFLOZIN,SOTAGLIFLOZIN,CHEMBL2018096,DAPAGLIFLOZIN,ERTUGLIFLOZIN,REMOGLIFLOZIN ETABONATE,TOFOGLIFLOZIN HYDRATE,SERGLIFLOZIN ETABONATE,CANAGLIFLOZIN,REMOGLIFLOZIN,BEXAGLIFLOZIN,CANAGLIFLOZIN HYDRATE,DAPAGLIFLOZIN PROPANEDIOL
225	603	TRPM8,TRPV2	CANNABIDIOL,5-BENZYLOXYTRYPTAMINE,D-3263,CHEMBL1289953
290	604	CSNK1D,CSNK1A1,CSNK1E	CHEMBL1951415,IC261,CHEMBL410456,CHEMBL2069623
229	605	PGC,PGA3,PGA5	NAFCILLIN,ECABET,Sucralfate
231	606	CD19	MEDI-551,SAR-3419,DENINTUZUMAB MAFODOTIN,ONCOLYSIN B,TAPLITUMOMAB PAPTOX,MDX-1342
95	607	SLC2A1,SLC28A2,SLC28A1	THYMIDINE,URIDINE
149	608	GRIK1	CHEMBL274226,CHEMBL373429,CHEMBL121915,CHEMBL387049,CHEMBL301536,CHEMBL373428,CHEMBL426,CHEMBL113180,CHEMBL156717,CHEMBL372797,CHEMBL28472
239	609	CD4	PRILIXIMAB,CLENOLIXIMAB,TRX-1,ZANOLIMUMAB,CEDELIZUMAB,KELIXIMAB,BT-061,IBALIZUMAB,TREGALIZUMAB
178	610	GABBR1,GABBR2,SLC52A2	ARBACLOFEN,CHEMBL1213187,Lesogaberan,BACLOFEN,PHACLOFEN,OXYBATE,ARBACLOFEN PLACARBIL,CHEMBL40157,SODIUM OXYBATE,PROGABIDE,CHEMBL1895916,CHEMBL113553,CHEMBL312403,CHEMBL112203,CHEMBL455185
234	611	FN1	L19IL2,L19TNFa,L19SIP
236	612	F2RL3,F2RL2	TRIFLUSAL,IODIPAMIDE,VORAPAXAR,RUSALATIDE
157	613	PYGM,PYGL,PYGB	SIVELESTAT
288	614	NR1D1,NR1D2	ATENOLOL,SR9011,SR9009,HEMIN,GSK-4112
243	615	CYP51A1	AZALANSTAT,FLUCONAZOLE
17	616	GRIA4,GRIA1,GRIA2,GRIK4,GRIA3,GSR,GRIK3,GRIK5	CHEMBL1255648,ZONAMPANEL,CYCLOTHIAZIDE,PERAMPANEL,CHEMBL136800,GYKI-52466,KAINIC ACID,MIBAMPATOR,Selurampanel,MK-8777,CHEMBL265301,CHEMBL1097939,TEZAMPANEL,CHEMBL197726,CEFOTAXIME,FARAMPATOR,BECAMPANEL,PIRACETAM,CHEMBL334920,BICIFADINE,CX1739,ANIRACETAM,PF-04958242,JORO SPIDER TOXIN 3,TALAMPANEL,DASOLAMPANEL,CHEMBL320642,CHEMBL123132,CHEMBL222418,(R,S)-AMPA,OXIGLUTATIONE,CHEMBL77862,DOMOIC ACID,N…
213	617	IMPA1,GSK3B,GSK3A	LITHIUM CITRATE HYDRATE,LITHIUM CARBONATE,CHEMBL322970,CHIR-99021,ALSTERPAULLONE,ALOISINE A,Tideglusib,SB-216763,AZD-1080,CHEMBL284861,LY-2090314,CHEMBL359482,CHEMBL311228,CHEMBL1082552,CHEMBL405759,KENPAULLONE
342	618	SLC44A1,TTK,SLC5A7	DIETHYLPROPION,HEMICHOLINIUM-3,BAY-1217389,DEXAMETHASONE SODIUM PHOSPHATE,BAY-1161909,CHEMBL54918
103	619	TRPC5,TRPC4	ENGLERIN A,CHEMBL1459962
245	620	UGCG	ELIGLUSTAT TARTRATE,MIGLUSTAT,ELIGLUSTAT
193	621	VKORC1	ACENOCOUMAROL,PHENINDIONE,WARFARIN SODIUM,TECARFARIN,WARFARIN POTASSIUM
159	622	S1PR2,S1PR1,S1PR4,S1PR3,GPR3,ACTL6A,S1PR5,ADCY6,P2RY10	CHEMBL570352,MONTELUKAST,CHEMBL1221649,DIPHENYLENEIODONIUM CHLORIDE,OZANIMOD,FINGOLIMOD HYDROCHLORIDE,CHEMBL389033,CHEMBL382739,APD334,Siponimod,CHEMBL225155,MEGESTROL ACETATE,PONESIMOD,FINGOLIMOD,AMISELIMOD HYDROCHLORIDE,AMG-714,CHEMBL1452805,CHEMBL3086703,CHEMBL1368758,KRP203,CHEMBL319757,FINGOLIMOD PHOSPHATE,CHEMBL224720
249	623	PAH,NOS3	SAPROPTERIN,SAPROPTERIN DIHYDROCHLORIDE,THIOUREA
250	624	CCR9	HYDRALAZINE,VERECIMON,MLN3126
39	625	HTR1A,HTR1D,SLC18A1,ALOX5AP,HTR2A,HTR6,HTR1B,HTR2B,SERPINA3,HTR2C,HTR4,HTR1E,HTR5A,HTR1F,GCG,HTR7,JUND,CGF1,RAD50,E2F2,S12,FOXO1,E2F3,TXNIP,SLC36A1,CYP2D7,LUM,ALAD,PPP1R1B,FADD	PANTOPRAZOLE,CHEMBL313714,ZIPRASIDONE,KETANSERIN,VELIFLAPON,SB-742457,XANOMELINE,CLOZAPINE,ILOPERIDONE,CHEMBL49247,BUSPIRONE HYDROCHLORIDE,SB-224289,PIZOTYLINE,RIZATRIPTAN,CHEMBL221692,RU-24969,QUINPIROLE,ITI-007 (CHEMBL3545044),SEROTONIN,ERGOTAMINE,MESULERGINE,CHEMBL41716,CHEMBL20963,NARATRIPTAN HYDROCHLORIDE,RISPERIDONE,BREXPIPRAZOLE,ZOLMITRIPTAN,PROCAINAMIDE,SARPOGRELATE,CHEMBL3186179,BIFEPRUN…
255	626	CD33	GEMTUZUMAB OZOGAMICIN,M195,LINTUZUMAB,ONCOLYSIN M
256	627	CD40LG	RUPLIZUMAB,TORALIZUMAB,CDP-7657
257	628	EEF2,MSLN	SS1(dsFv)-PE38,AMATUXIMAB
212	629	P2RY4,P2RY2	CHEMBL1233686,CHEMBL1233534,CHEMBL217803,URIDINE TRIPHOSPHATE,DENUFOSOL TETRASODIUM,CHEMBL1765119,DENUFOSOL,DIQUAFOSOL,GUANOSINE TRIPHOSPHATE,CHEMBL1767409,CHEMBL373780,CHEMBL1784904,N-METHANOCARBA-UTP
286	630	FCGR2B,FCGR2A	THIOLACTOMYCIN
369	631	APLNR,MRGPRD	ALANINE,CHEMBL414173,LIDOCAINE HYDROCHLORIDE
189	632	LPAR2,LPAR1,LPAR5,LPAR3,LPAR4	FARNESYL DIPHOSPHATE,CYPROHEPTADINE,CYCLOPENTOLATE,PROSCILLARIDIN,ARACHIDONOYL GLYCINE,CHEMBL1395060
191	633	GRPR,NMBR,BRS3	DESOXYCORTICOSTERONE,CHEMBL403317,CHEMBL1161480,CHEMBL2023109,CHEMBL405908,CHEMBL86828,CYTIDINE,CHEMBL1672354,CYSTETINE TRIPHOSPHATE,CHEMBL1084942,CHEMBL329650,CHEMBL1091720,CHEMBL45002,CHEMBL3187503,BOMBESIN
363	634	CTSF,CTSS,CTSL	CHEMBL2153161,CHEMBL222649
260	635	G6PD,MRGPRX1,SLC34A2	PRIMAQUINE,CHLOROQUINE,CO-TRIMOXAZOLE,SUCCIMER,QUININE SULFATE,SODIUM NITRITE,MAFENIDE,SULFISOXAZOLE,RASBURICASE,SODIUM SULFATE,NALIDIXIC ACID,SULFAMETHOXAZOLE,PEGLOTICASE,SODIUM ASCORBATE
274	636	SRD5A3,SRD5A1,SRD5A2	LEVONORGESTREL,DUTASTERIDE
261	637	CCR4,TPP2	HYDROXYPROGESTERONE CAPROATE,MOGAMULIZUMAB,CHEMBL1207374,CHEMBL67158,AMG-761
121	638	IKBKB,CHUK,IKBKE	MLN-0415,CHEMBL257167,CHEMBL592893,PIRINIXIC ACID,IMD-1041,IMD-2560,BMS-345541,SAR-113945,CHEMBL608538,AURANOFIN,AS-602868,IMD-0354
292	639	NPR2,DLX3,NPR3	NESIRITIDE,ERYTHRITYL TETRANITRATE,BETAXOLOL,POLYTHIAZIDE,CENDERITIDE,PREDNISOLONE SODIUM PHOSPHATE,PIRBUTEROL,VOSORITIDE
113	640	FAAH	CHEMBL2164602,CHEMBL560590,CHEMBL1651524,CHEMBL177577,CHEMBL184238,CHEMBL1651534
263	641	SLC10A2	TAUROCHOLIC ACID,ELOBIXIBAT,CHEMBL332370
158	642	SYK	FOSTAMATINIB,R-343 (CHEMBL3545340),TAMATINIB,ENTOSPLETINIB,CHEMBL2177736,R-333,R-348,PRT-2607
264	643	CD47,CD36	CHEMBL262489
265	644	CSNK2A1,CSNK2A2,HIPK3,DAPK3	SILMITASERTIB
130	645	MVK	FARNESOL,GERANYL DIPHOSPHATE,DIMETHYLALLYL DIPHOSPHATE
313	646	RUNX1,KDM1A	TRANYLCYPROMINE,DIPHENHYDRAMINE HYDROCHLORIDE,CHEMBL1797639
266	647	TNNC1	ALUMINIUM GLYCINATE,LEVOSIMENDAN
270	648	C5AR1	FOSMIDOMYCIN,CHEMBL444125,CHEMBL368161,LOPINAVIR,CCX168,CHEMBL41547
226	649	LIPF,PNLIP,FASN,NRP1,HSPG2	PALIFERMIN,ORLISTAT,DALBAVANCIN,PEGAPTANIB OCTASODIUM,CETILISTAT,CERULENIN
273	650	PLA2G7	RILAPLADIB,DARAPLADIB
349	651	ITPR2,ITPR3	CHEMBL420806,SODIUM ORTHOVANAD,INS(1,4,5)P3,ADENOPHOSTIN A
344	652	IL17B,IL17C,IL25	CHEMBL197194
275	653	SGK2,SGK1	GSK-650394
155	654	NPR1,GUCY1B2,GUCY1A2,GUCY1B3,COL4A5,GUCY1A3,ITPR1	ISOSORBIDE DINITRATE,NITRIC OXIDE,RIOCIGUAT,CHEMBL1236936,NITROGLYCERIN,SODIUM NITROPRUSSIDE,NITROPRUSSIDE,ISOSORBIDE MONONITRATE,LATANOPROSTENE BUNOD,CHEMBL598952,NAPROXCINOD,CHEMBL374385,CHEMBL353759,ATACIGUAT
278	655	NR1I3	CLOTRIMAZOLE,MECLIZINE,CHEMBL458603
167	656	CACNB4,CACNA1I,CACNB3,CACNA1B,CACNG2,CACNA2D3,CACNG7,CACNG3,CACNA2D2,CACNG6,CACNA1G,CACNA2D4,FOXJ1,CACNA1E,CACNA1A,CACNB2,CACNA1H,CACNG5,CACNG4	IMAGABALIN,PREGABALIN,ATAGABALIN,GABAPENTIN,BEPRIDIL HYDROCHLORIDE,MIBEFRADIL DIHYDROCHLORIDE,FLUNARIZINE,GABAPENTIN ENACARBIL,MIROGABALIN BESYLATE,CHEMBL157769,PARAMETHADIONE,METHSUXIMIDE,ZICONOTIDE,CILNIDIPINE,ETHOSUXIMIDE,TRIMETHADIONE,BUDIODARONE,CNV2197944,PHENSUXIMIDE,CHEMBL1684954,Z160,ZICONOTIDE ACETATE
277	657	PPIA,PPID,PPIB	L-PROLINE,CHEMBL1269597
297	658	TRPC7,TRPC1,TRPV6,TRPC3	CHEMBL169233
348	659	IL10RB,IFNLR1	PYRIDOSTIGMINE,PYRILAMINE,PEGINTERFERON LAMBDA-1A
304	660	ACVR1C	SB-431542,PJ34 (CHEMBL372303),PROPIDIUM,ETHAMBUTOL HYDROCHLORIDE
364	661	SIRT2,SIRT3	SODIUM LAURYL SULFATE
283	662	CTSD,CTSE,CASP14	GRASSYSTATIN A,CHEMBL313773,CHEMBL81927
2	663	DNTT,TK2,SLC15A1	ZALCITABINE,ACYCLOVIR
289	664	ALDH5A1	VALPROATE SODIUM,DIVALPROEX SODIUM,CHEMBL378577,SUCCINIC ACID
367	665	CDC7,TAOK3	NMS-1116354,CHEMBL2030402,CHEMBL524266,RXDX-103,BMS-863233 (CHEMBL3544943)
126	666	CYP11B1,CYP11B2	FADROZOLE,OSILODROSTAT,METYRAPONE
347	667	GIPR	MK-0893,CHEMBL323556
58	668	TNFRSF8	IRATUMUMAB,SGN-30
298	669	PRMT5	SULFOXONE SODIUM,AMBENONIUM CHLORIDE
299	670	PRSS1	CAMOSTAT,NAFAMOSTAT
145	671	CA9	CG250 177LU,GIRENTUXIMAB,CG250 111IN,IODINE I 124 GIRENTUXIMAB
356	672	GHSR,CH25H	ANAMORELIN,TABIMORELIN,ANAMORELIN HYDROCHLORIDE,MACIMORELIN,ULIMORELIN HYDROCHLORIDE
21	673	CCR5,UGT1A9	MARAVIROC,PRO-140,CHEMBL1196395,AZD5672,CHEMBL41275,GLYCERIN,INCB-9471,CHEMBL78535,VICRIVIROC,ANCRIVIROC (CHEMBL2107311),APLAVIROC HYDROCHLORIDE,APLAVIROC,CHEMBL207004,VICRIVIROC MALEATE
301	674	GPR18	CHEMBL418353,CHEMBL285932
302	675	PTPN1	TILUDRONIC ACID,TRODUSQUEMINE
293	676	CETP	TORCETRAPIB,ANACETRAPIB,DALCETRAPIB,EVACETRAPIB,CHEMBL67129
303	677	PDK3,PDK4,PDK2,PDHA1,PDHB,PDHA2	CHEMBL3186849
117	678	PDE4C,PDE4B,PDE3B,PDE4A,PDE4D,PDE7B,PDE6B,PDE3A,PDE5A,PDE11A,PDE7A,PDE9A,RIPK1,CNGA1,PDE10A,PDE6A,PDE6C,PDE8B,PDE1C,PDE2A,PDE1A,PDE8A,PDE6D,PDE6G,PDE6H,ABCC5,PECAM1,CNGA2	OXTRIPHYLLINE,DYPHYLLINE,THEOPHYLLINE,PENTOXIFYLLINE,ENPROFYLLINE,DIPYRIDAMOLE,CRISABOROLE,RESVERATROL,APREMILAST,AMINOPHYLLINE,INAMRINONE,SILDENAFIL,IBUDILAST,TADALAFIL,THEOPHYLLINE SODIUM GLYCINATE,CHEMBL1232082,CHEMBL395336,ROFLUMILAST,AVANAFIL,FLAVOXATE HYDROCHLORIDE,MILRINONE,DEQUALINIUM,CHEMBL484928,ANAGRELIDE HYDROCHLORIDE,ENOXIMONE,ETAZOLATE,GISADENAFIL,VARDENAFIL HYDROCHLORIDE,VARDENAFIL…
252	679	GPR39	CHEMBL3092413,ERGOCALCIFEROL
94	680	PTH,FDPS,IDI1	IBANDRONIC ACID,DROMOSTANOLONE PROPIONATE,DROPERIDOL,CLOMIPHENE,(CYCLOHEXYLAMINO)METHYLENEDIPHOSPHONIC ACID,CHEMBL294192,CHEMBL437758,PAMIDRONATE DISODIUM,ALENDRONATE SODIUM,CHEMBL99553,DOXAPRAM,PIRIDRONIC ACID,RISEDRONATE SODIUM,IBANDRONATE SODIUM,POTASSIUM CITRATE
351	681	SLC6A1,SLC6A12	COCAINE,TIAGABINE HYDROCHLORIDE,OFLOXACIN,TIAGABINE,CHEMBL545050,CHEMBL77287,CHEMBL543557
305	682	VDAC3,VDAC2,VDAC1	OLESOXIME
306	683	IL13	ANRUKINZUMAB,QAX-576,TNX-650,TRALOKINUMAB,LEBRIKIZUMAB
171	684	CTSK	RELACATIB,BALICATIB,CHEMBL437501,CHEMBL1085282
282	685	FFAR2,ADARB2	ISOBUTYRIC ACID,VALERIC ACID,TIRATRICOL,ACETIC ACID,PROPIONIC ACID,CHEMBL52416
100	686	SLC12A3,SLC12A1,SLC12A2,GPR35,SLC12A5,KCNE1,SLC12A4	HYDROCHLOROTHIAZIDE,HYDROFLUMETHIAZIDE,ETHACRYNATE SODIUM,INDAPAMIDE,TORSEMIDE,BUMETANIDE,FUROSEMIDE,PAMOIC ACID,BENZTHIAZIDE,PIRETANIDE,QUINETHAZONE,ALDOSTERONE,POTASSIUM CHLORIDE,METOLAZONE,CHLORMERODRIN,METHYCLOTHIAZIDE,TRANSTORINE,CHLOROTHIAZIDE SODIUM
310	687	HIF1A,SETD2	NOSCAPINE,CHEMBL1080759,CHEMBL299763,PIMONIDAZOLE
317	688	HCAR2,HCAR3	ISOETHARINE HYDROCHLORIDE,ACIFRAN,CHEMBL247132,CINNAMIC ACID,MEPENZOLATE,CHEMBL456145,METHYL FUMARATE,CHEMBL1086657,CHEMBL1741437,CHEMBL2036958,COUMARIC ACID,ACIPIMOX
55	689	IL1A,IL1B,IL1RN	RILONACEPT,CELASTROL,CANAKINUMAB,NICARDIPINE,CEFACLOR,DIACEREIN,GEVOKIZUMAB,AMG-108,RA-18C3,PENTAMIDINE
67	690	VIPR2,ADCYAP1R1,CALM1,MYLK,PDE1B,VIPR1,SCTR	CHEMBL525028,AZELAIC ACID,BEPRIDIL,SECRETIN,SECRETIN SYNTHETIC HUMAN,AZITHROMYCIN,SECRETIN SYNTHETIC PORCINE,AZASETRON
38	691	MAOA,MAOB,PAK2,CBX4,CYP2C8	PHENELZINE,PHENELZINE SULFATE,Indantadol,MOCLOBEMIDE,TRANYLCYPROMINE SULFATE,CLORGILINE,BEFLOXATONE,TRIMETHOPRIM,PIRLINDOLE,SELEGILINE,ISOCARBOXAZID,K-252A,PARGYLINE HYDROCHLORIDE,RASAGILINE MESYLATE,RASAGILINE,RIFAMPICIN,SAFINAMIDE MESYLATE,SELEGILINE HYDROCHLORIDE,PARGYLINE,CHEMBL45069,LAZABEMIDE
316	692	TNFRSF4,TNFSF4	AJULEMIC ACID,OXELUMAB
280	693	NGFR,NGF	Fasinumab,FULRANUMAB,TANEZUMAB,PG-110,RADICICOL
319	694	M6PR	ALGLUCOSIDASE ALFA,GALSULFASE
358	695	TRPV3	MENTHOL,GRC-15300
321	696	ANGPT2,ANGPT1	NESVACUMAB,REGN-910,TREBANANIB,MEDI-3617
122	697	HCN1,HCN2,HCN4,HCN3	IVABRADINE,CHEMBL2052019,CILOBRADINE,IVABRADINE HYDROCHLORIDE,ZATEBRADINE
242	698	TLR9	HYDROXYCHLOROQUINE SULFATE,AGATOLIMOD,AGATOLIMOD SODIUM
328	699	MAP3K8	CHEMBL200381,CHEMBL404939
330	700	PPP3CA,PPP3CB,PPP3CC	VOCLOSPORIN
49	701	TRPM7,CNGA3	CYCLIC ADENOSINE MONOPHOSPHATE
355	702	PRLR	SOMATROPIN,CHEMBL1735158
118	703	COL6A6,LAMC2,COL5A1,COL11A1,COL1A2,COL1A1,COL18A1,COL28A1,LAMB2,COL2A1,COL15A1,LAMA5,COL4A4,COL27A1,COL3A1,COL6A3,COL4A1,COL4A2,COL5A3,COL24A1,COL5A2,COL6A2,LAMB1,COL11A2,COL4A3,COL6A1,LAMB4,LAMB3,LAMC3,COL6A5,LAMA2,LAMA1,COL4A6,LAMA4,LAMA3	OCRIPLASMIN,COLLAGENASE CLOSTRIDIUM HISTOLYTICUM,ANTAZOLINE HYDROCHLORIDE
337	704	GC,GBA	AFEGOSTAT TARTRATE,AFEGOSTAT
338	705	MAPKAPK3,MAPKAPK5	CHEMBL226403,GLPG-0259
323	706	SUCNR1	METHYLMALONIC ACID,CHEMBL305801,MALEIC ACID
368	707	ANO1,CLCN7	TANNIC ACID,METRONIDAZOLE,CROFELEMER,CHEMBL1162149,5-NITRO-2-PHENYLPROPYLAMINOBENZOIC ACID [NPPB],CHEMBL23050
339	708	SLC9A3	SQUALAMINE LACTATE,TENAPANOR HYDROCHLORIDE
341	709	PCSK1,PCSK6,PCSK5,FURIN	CHEMBL566340,RACEPHEDRINE HYDROCHLORIDE
281	710	MCHR1,DPP8	KETOTIFEN,CHEMBL2110360,CHEMBL384701,TRIPARANOL,CHEMBL1934835,CHEMBL2147475,CHEMBL214021,CHEMBL2147477,CHEMBL178707,CHEMBL1760248,CHEMBL1416728,CHEMBL182150
228	711	ICAM1	LIFITEGRAST,ALICAFORSEN,BI-505,ENLIMOMAB PEGOL
335	712	PEMT	CANTUZUMAB RAVTANSINE,CANTUZUMAB MERTANSINE,AR-20.5,SONTUZUMAB,Pemtumomab
108	713	IFNL3,CELA1,CTSA	OMBITASVIR,DACLATASVIR,DASABUVIR,GRAZOPREVIR,PEGINTERFERON ALFA-2B,BOCEPREVIR,LEDIPASVIR,SIMEPREVIR,TELAPREVIR,PARITAPREVIR,VELPATASVIR,ELBASVIR,SOFOSBUVIR
343	714	IGHE	Ligelizumab,TALIZUMAB,AL-901,QUILIZUMAB
324	715	HSD11B1,PI4KA	PHENYLARSINE OXIDE,CHEMBL2153191,CHEMBL2177609,CHEMBL222670
246	716	PLA2G2A,PLA2G5,PLA2G10	VARESPLADIB METHYL,VARESPLADIB,ETIDRONATE DISODIUM,CHEMBL1084102
346	717	TGFB2,TGFB3	LERDELIMUMAB,TRABEDERSEN,BELAGENPUMATUCEL-L,FRESOLIMUMAB
353	718	ECE1	DAGLUTRIL,CHEMBL571153,INDOLE-3-BUTYRIC ACID
138	719	LGR5,SLC47A1,ACTG1P4,LGR4	CIMETIDINE,TETRYLAMMONIUM
235	720	CPN1,CPB2	PYRAZINAMIDE,CHEMBL398110,LAUDANOSINE
325	721	RAMP3,CALCR,TAP2,RAMP1,RAMP2	MONOETHANOLAMINE,CALCITONIN HUMAN,PRAMLINTIDE,CALCITONIN,DAVALINTIDE,AMYLIN,CALCITONIN SALMON RECOMBINANT,PRAMLINTIDE ACETATE,SMC021,CALCITONIN SALMON
150	722	CASP3	CHEMBL586058,CHEMBL417149
271	723	CNTFR	SCH-37370,PHYSOSTIGMINE SULFATE
362	724	CCL2	CHEMBL134074,CARLUMAB
357	725	CPT1A,CPT1B	PERHEXILINE,LEVOCARNITINE
336	726	GLP2R	TEDUGLUTIDE,ELSIGLUTIDE
359	727	NEK1,NEK2	UNDECANOATE,GSK-579289A
332	728	GNMT,MTRR,AGER,TCN1	VITAMIN B12,CYANOCOBALAMIN
165	729	SLC1A2,SLC1A6	2S,4R-4-METHYLGLUTAMATE,DIHYDROKAINATE,O-BENZYL-l-SERINE,CHEMBL1628669
294	730	STAT3,KEAP1,HEBP1	BARDOXOLONE METHYL,DIMETHYL FUMARATE,ATIPRIMOD
253	731	SI,AMY2A,MGA,MGAM,GAA	ACARBOSE,MIGLITOL,VOGLIBOSE,DUVOGLUSTAT HYDROCHLORIDE,DUVOGLUSTAT,CELGOSIVIR
365	732	MTTP,P4HB	LOMITAPIDE,IMPLITAPIDE,LOMITAPIDE MESYLATE
230	733	ELANE,PRTN3	TIPRELESTAT,DEPELESTAT,ERDOSTEINE,MOXALACTAM,SIVELESTAT SODIUM
331	734	TNFRSF9	URELUMAB,UTOMILUMAB
72	735	TRPM2,TRPV5	MICONAZOLE,ECONAZOLE,ADENOSINE DIPHOSPHATE RIBOSE
198	736	SLCO1A2,SLCO1C1	DPDPE,BROMOSULFOPHTHALEIN,NARINGIN
361	737	MYLK2,EIF2AK3	CHEMBL2171124
120	738	BMP10,ACVRL1,GDF2	Delantercept,PF-03446962
56	739	DDIT3,TRPA1,GLS,SLC38A3,SLC1A5	BENZOQUINONE,GLUTAMINE,CHEMBL1086339,MORPHANTHRIDINE,ACETALDEHYDE,ALLICIN,6-DIAZO-5-OXO-L-NORLEUCINE,(-)-OLEOCANTHAL,ARTEPILLIN,1'-ACETOXYCHAVICOL ACETATE,SALIRASIB,GRC-17536,THYMOL,CHEMBL1608558,CHLOROPICRIN,CHEMBL1818218,METHYLGLYOXAL,PHENACYL CHLORIDE,BROMO ACETONE,ISOVELLERAL,BENZYL BROMIDE,CB-189625,ACROLEIN,BENZYLCYSTEINE,DIBUTYL PHTHALATE
